# Supplementary material
Source: publisher figshare collection journal article supplement (https://acs.figshare.com/ndownloader/files/7684735)
Supplement: Supplementary file 1 [file 7684735]

## Supporting information

# Neuroprotective Caffeoylquinic Acid Derivatives from the Flowers of *Chrysanthemum morifolium*

Peng-fei Yang, Zi-ming Feng, Ya-nan Yang, Jian-shuang Jiang, Pei-cheng Zhang\*

State Key Laboratory of Bioactive Substance and Function of Natural Medicines, Institute of Materia Medica, Peking Union Medical College and Chinese Academy of Medical Sciences, Beijing 100050, China

\* corresponding author. Tel.: +86-10-63165231. Fax: +86-10 6301-7757. Email address: pczhang@imm.ac.cn (P.-C. Zhang)

## Table of Contents

| Figures | Contents                                                                                 | Compound                         | Page |
|---------|------------------------------------------------------------------------------------------|----------------------------------|------|
| 1       | The UV Spectrum in MeOH                                                                  | 1                                | S3   |
| 2       | The ECD Spectrum in MeOH                                                                 | 1                                | S3   |
| 3       | The IR Spectrum (KBr)                                                                    | 1                                | S4   |
| 4       | The HR-ESI-MS Data                                                                       | 1                                | S4   |
| 5       | The <sup>1</sup> H NMR Spectrum in MeOH- <i>d</i> <sub>4</sub> (500 Hz)                  | 1                                | S5   |
| 6       | The <sup>13</sup> C NMR Spectrum in MeOH- <i>d</i> <sub>4</sub> (500 Hz)                 | 1                                | S5   |
| 7       | The HSQC Spectrum in MeOH- <i>d</i> <sub>4</sub> (500 Hz)                                | 1                                | S6   |
| 8       | The HMBC Spectrum in MeOH- <i>d</i> <sub>4</sub> (500 Hz)                                | 1                                | S6   |
| 9       | The <sup>1</sup> H- <sup>1</sup> H COSY Spectrum in MeOH- <i>d</i> <sub>4</sub> (500 Hz) | 1                                | S7   |
| 10      | The ROESY Spectrum in MeOH- <i>d</i> <sub>4</sub> (500 Hz)                               | 1                                | S7   |
| 11      | The <sup>1</sup> H NMR Spectrum in MeOH- <i>d</i> <sub>4</sub> (500 Hz)                  | 1a                               | S8   |
| 12      | The <sup>13</sup> C NMR Spectrum in MeOH- <i>d</i> <sub>4</sub> (500 Hz)                 | 1a                               | S8   |
| 13      | The ECD Spectrum in MeOH                                                                 | 1a                               | S9   |
| 14      | The <sup>1</sup> H NMR Spectrum in MeOH- <i>d</i> <sub>4</sub> (500 Hz)                  | 1b                               | S9   |
| 15      | The <sup>1</sup> H NMR Spectrum in MeOH- <i>d</i> <sub>4</sub> (500 Hz)                  | 4- <i>O</i> -caffeoylquinic acid | S10  |
| 16      | The UV Spectrum in MeOH                                                                  | 2                                | S10  |
| 17      | The ECD Spectrum in MeOH                                                                 | 2                                | S11  |
| 18      | The IR Spectrum (KBr)                                                                    | 2                                | S11  |
| 19      | The HR-ESI-MS Data                                                                       | 2                                | S12  |
| 20      | The <sup>1</sup> H NMR Spectrum in MeOH- <i>d</i> <sub>4</sub> (500 Hz)                  | 2                                | S12  |
| 21      | The <sup>13</sup> C NMR Spectrum in MeOH- <i>d</i> <sub>4</sub> (500 Hz)                 | 2                                | S13  |
| 22      | The HSQC Spectrum in MeOH- <i>d</i> <sub>4</sub> (500 Hz)                                | 2                                | S13  |
| 23      | The HMBC Spectrum in MeOH- <i>d</i> <sub>4</sub> (500 Hz)                                | 2                                | S14  |
| 24      | The <sup>1</sup> H- <sup>1</sup> H COSY Spectrum in MeOH- <i>d</i> <sub>4</sub> (500 Hz) | 2                                | S14  |
| 25      | The ROESY Spectrum in MeOH- <i>d</i> <sub>4</sub> (500 Hz)                               | 2                                | S15  |
| 26      | The <sup>1</sup> H NMR Spectrum in MeOH- <i>d</i> <sub>4</sub> (500 Hz)                  | 2a                               | S15  |
| 27      | The <sup>13</sup> C NMR Spectrum in MeOH- <i>d</i> <sub>4</sub> (500 Hz)                 | 2a                               | S16  |
| 28      | The ECD Spectrum in MeOH                                                                 | 2a                               | S16  |
| 29      | The UV Spectrum in MeOH                                                                  | 3                                | S17  |
| 30      | The ECD Spectrum in MeOH                                                                 | 3                                | S17  |
| 31      | The IR Spectrum (KBr)                                                                    | 3                                | S18  |

|    |                                                                         |    |     |
|----|-------------------------------------------------------------------------|----|-----|
| 32 | The HR-ESI-MS Data                                                      | 3  | S18 |
| 33 | The $^1\text{H}$ NMR Spectrum in $\text{MeOH-}d_4$ (500 Hz)             | 3  | S19 |
| 34 | The $^{13}\text{C}$ NMR Spectrum in $\text{MeOH-}d_4$ (500 Hz)          | 3  | S19 |
| 35 | The HSQC Spectrum in $\text{MeOH-}d_4$ (500 Hz)                         | 3  | S20 |
| 36 | The HMBC Spectrum in $\text{MeOH-}d_4$ (500 Hz)                         | 3  | S20 |
| 37 | The $^1\text{H-}^1\text{H}$ COSY Spectrum in $\text{MeOH-}d_4$ (500 Hz) | 3  | S21 |
| 38 | The ROESY Spectrum in $\text{MeOH-}d_4$ (500 Hz)                        | 3  | S21 |
| 39 | $^1\text{H-}^1\text{H}$ COSY and Key HMBC                               | 3  | S22 |
| 40 | The $^1\text{H}$ NMR Spectrum in $\text{MeOH-}d_4$ (500 Hz)             | 3a | S22 |
| 41 | The $^{13}\text{C}$ NMR Spectrum in $\text{MeOH-}d_4$ (500 Hz)          | 3a | S23 |
| 42 | The ECD Spectrum in MeOH                                                | 3a | S23 |
|    | ECD Calculation of <b>1a</b>                                            |    | S24 |

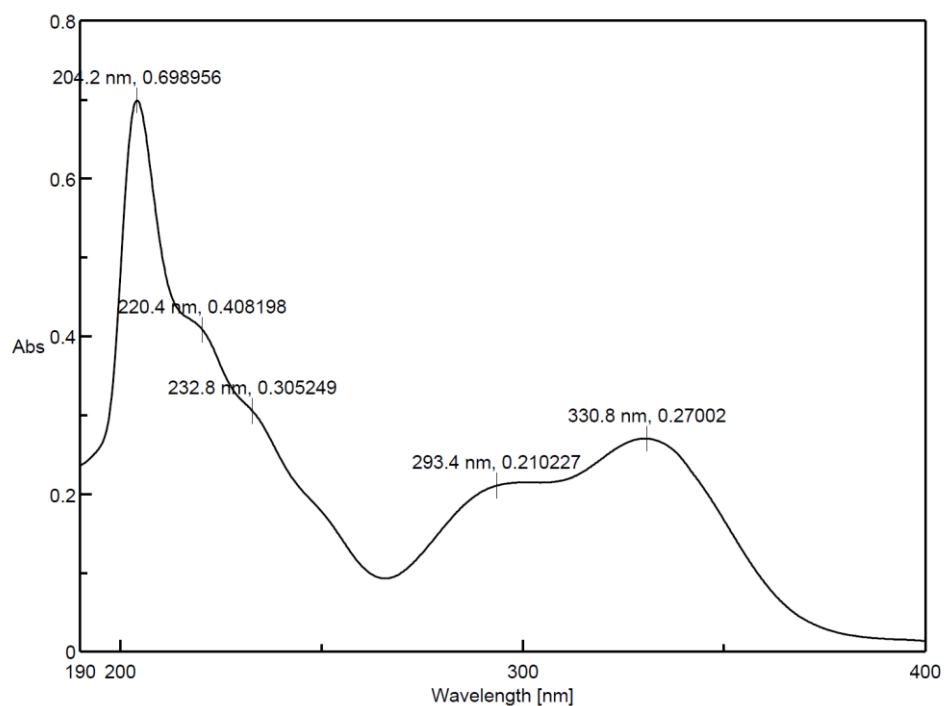

Figure 1. The UV Spectrum of compound **1** in MeOH

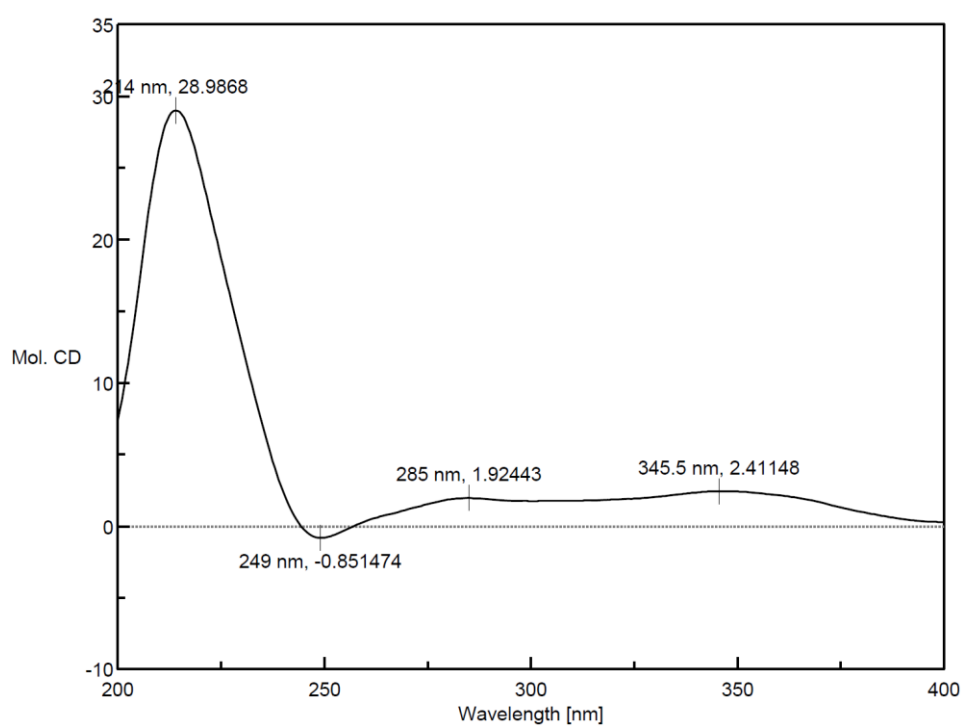

Figure 2. The ECD Spectrum of compound **1** in MeOH

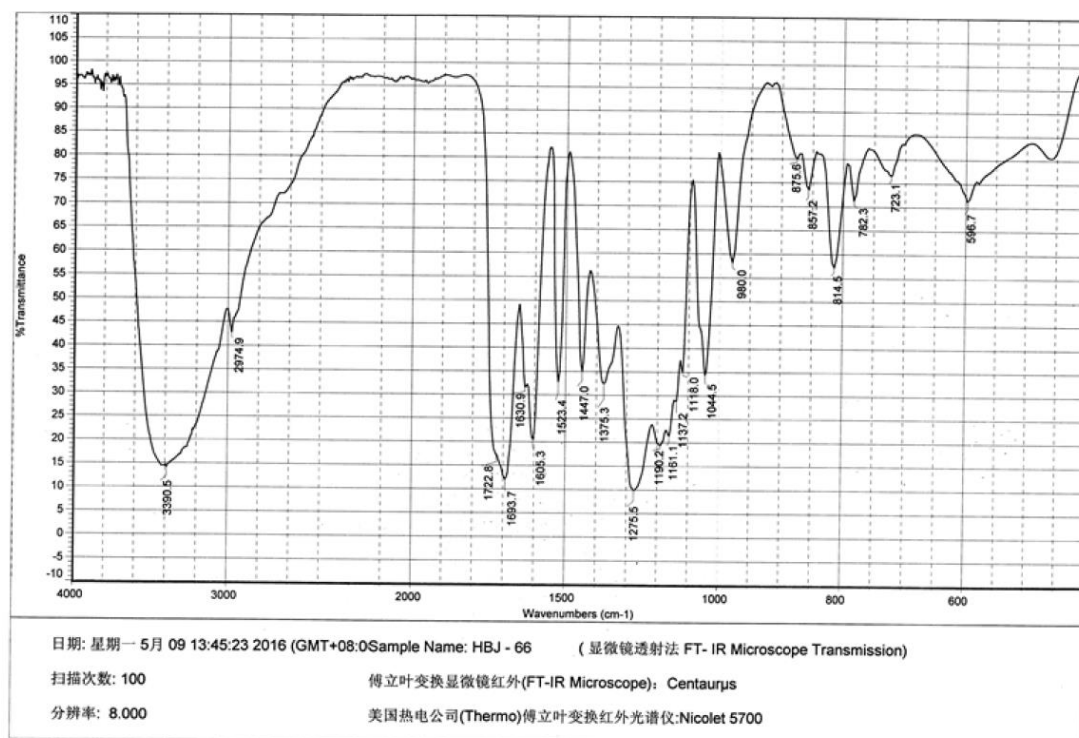

Figure 3. The IR Spectrum (KBr) of compound 1

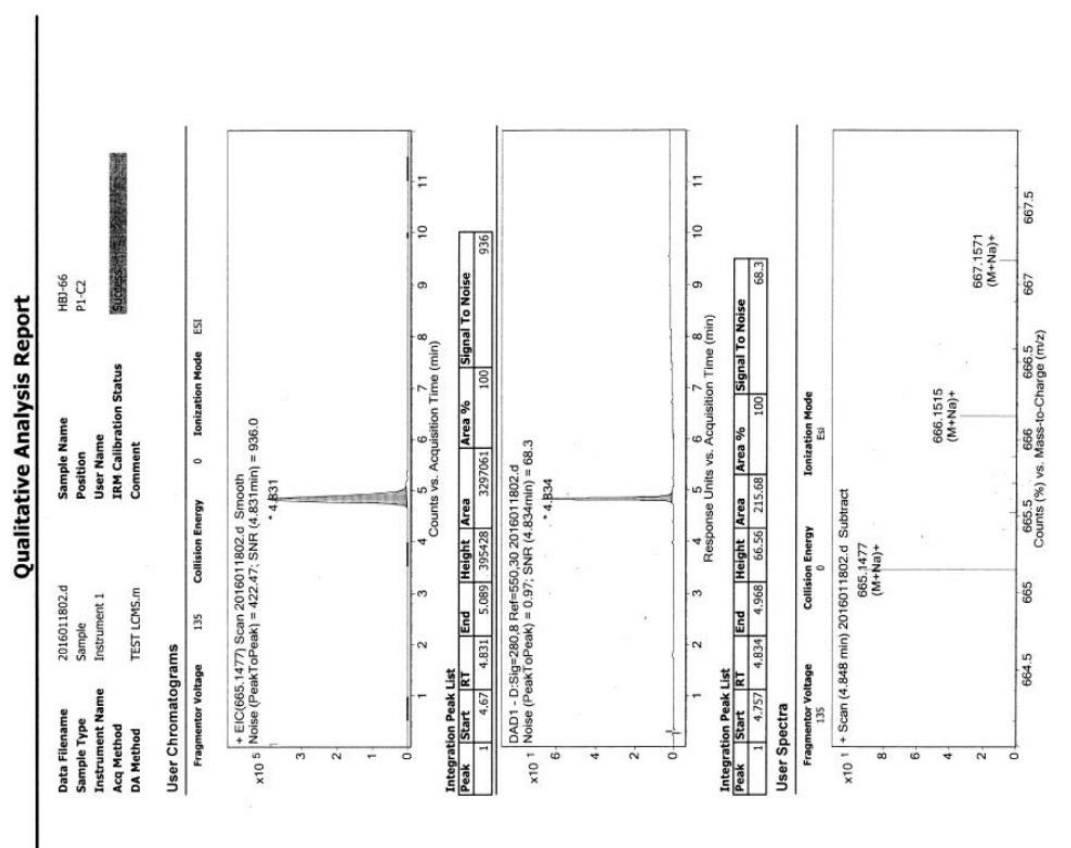

Figure 4. The HR-ESI-MS Data of compound 1

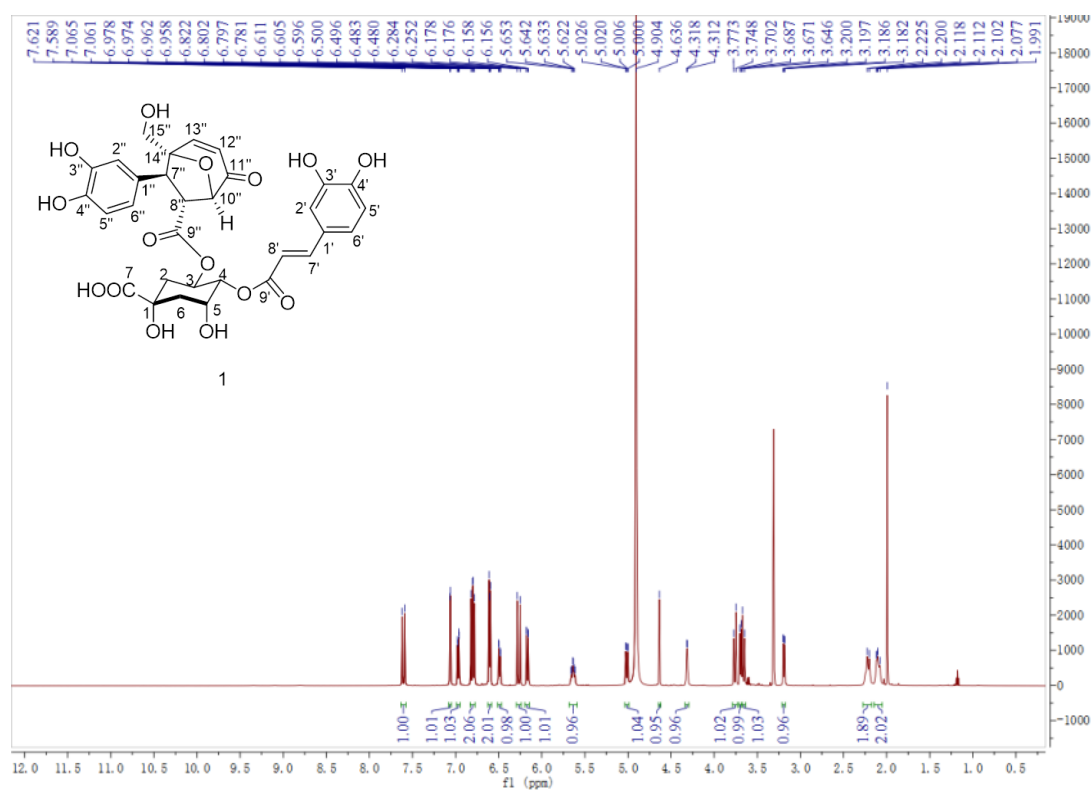

Figure 5. The <sup>1</sup>H NMR Spectrum of Compound **1** in MeOH-*d*<sub>4</sub> (500 Hz)

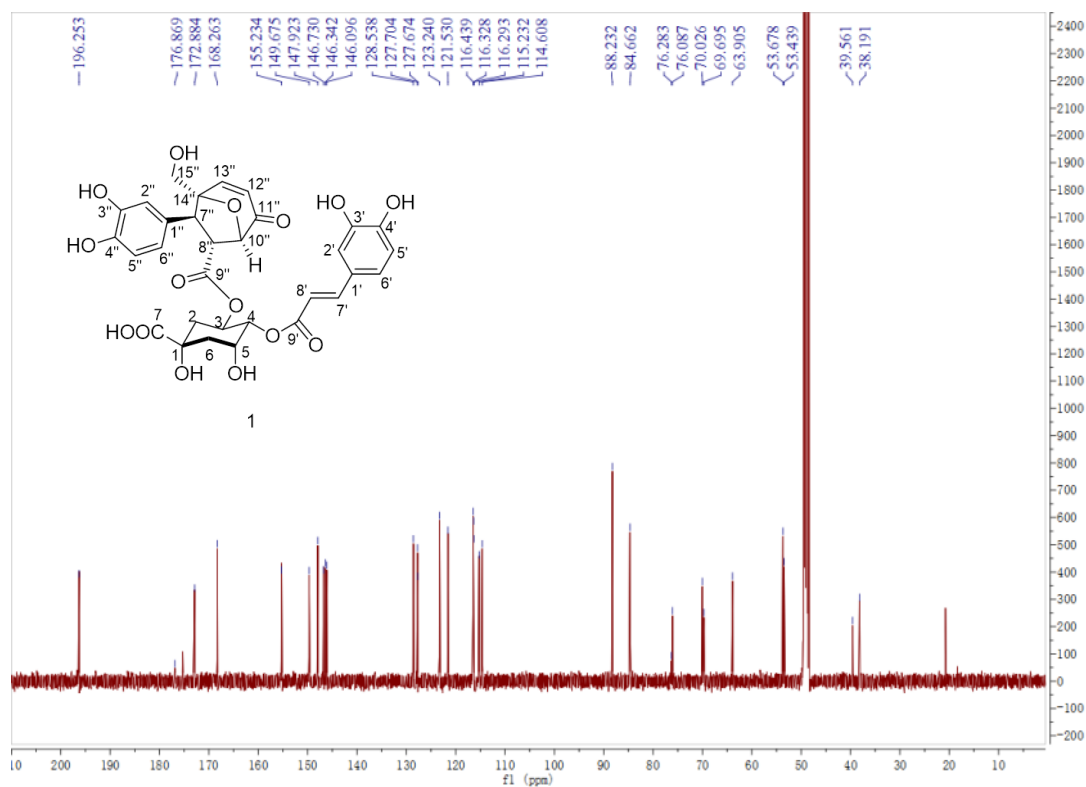

Figure 6. The <sup>13</sup>C NMR Spectrum of Compound **1** in MeOH-*d*<sub>4</sub> (500 Hz)

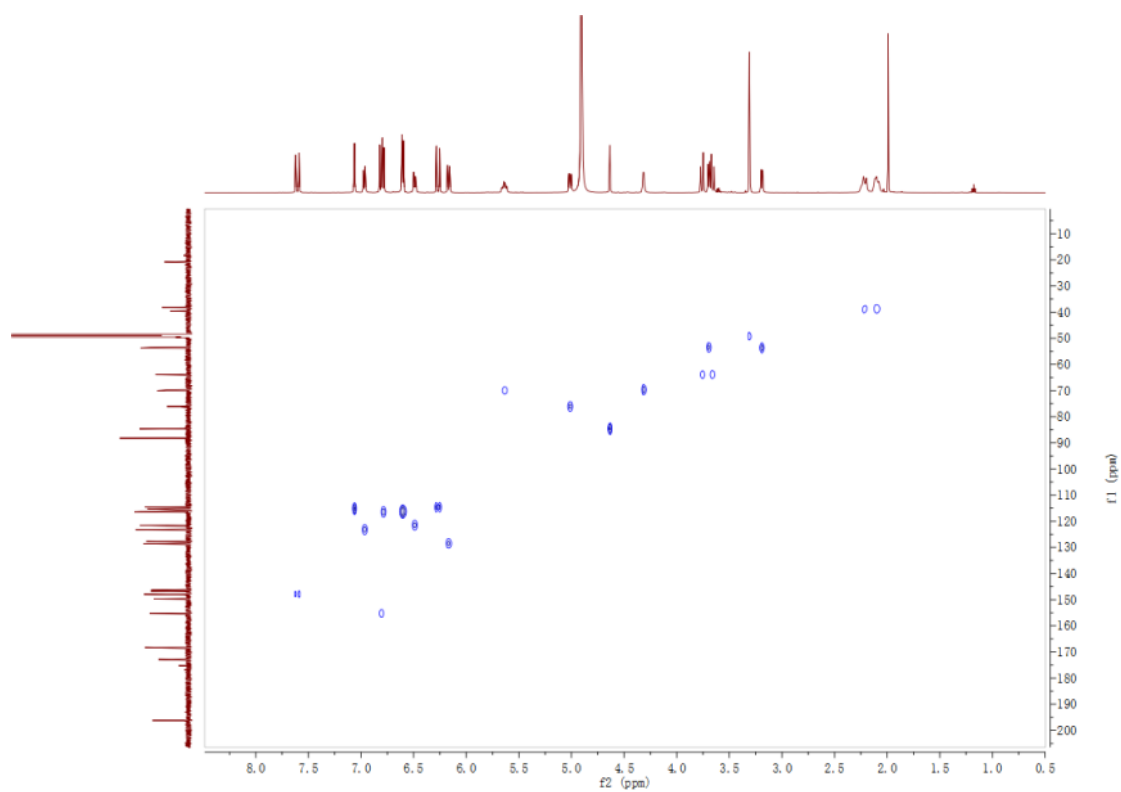

Figure 7. The HSQC Spectrum of Compound **1** in  $\text{MeOH-}d_4$  (500  $\text{Hz}$ )

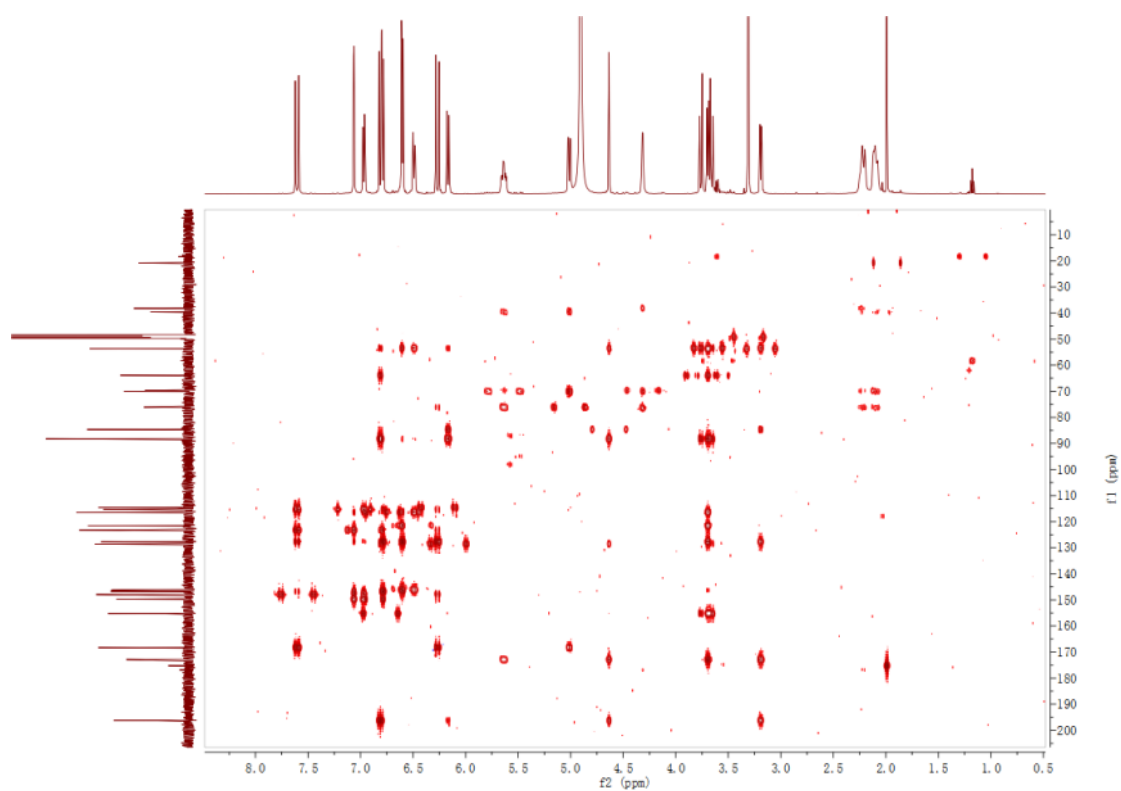

Figure 8. The HMBC Spectrum of Compound **1** in  $\text{MeOH-}d_4$  (500  $\text{Hz}$ )

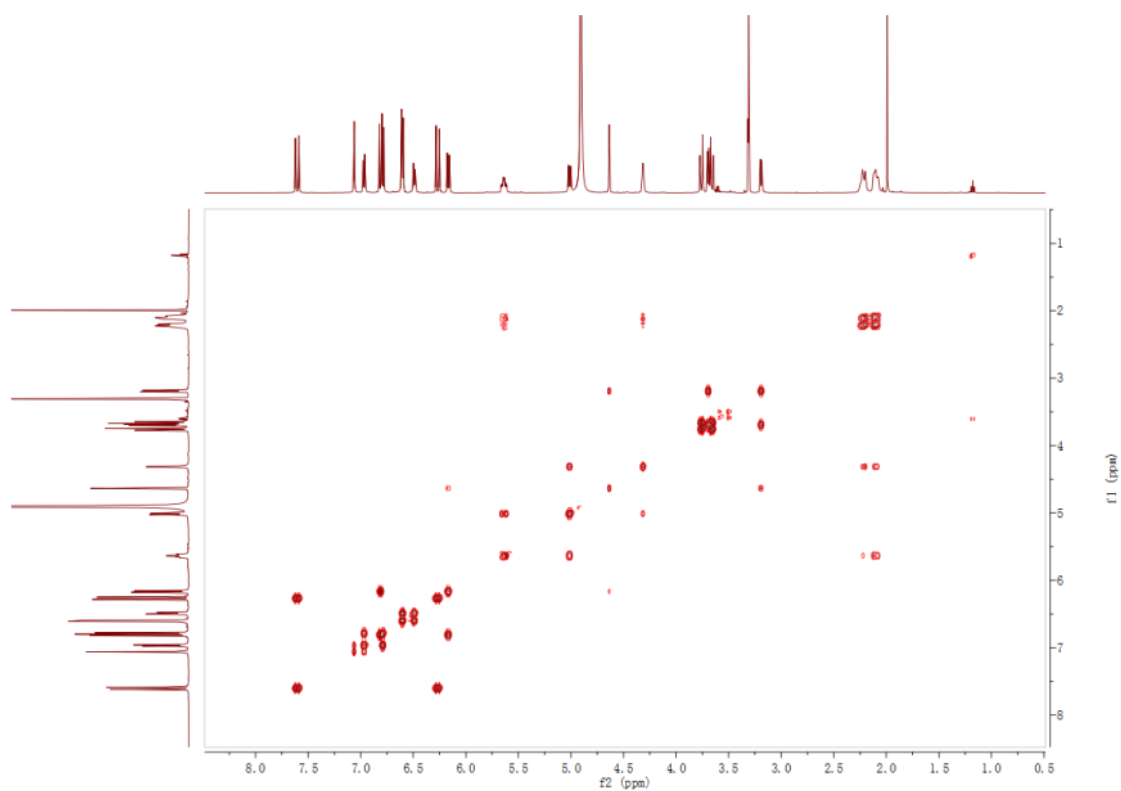

Figure 9. The  $^1\text{H}$ - $^1\text{H}$  COSY Spectrum of Compound **1** in  $\text{MeOH-}d_4$  (500 Hz)

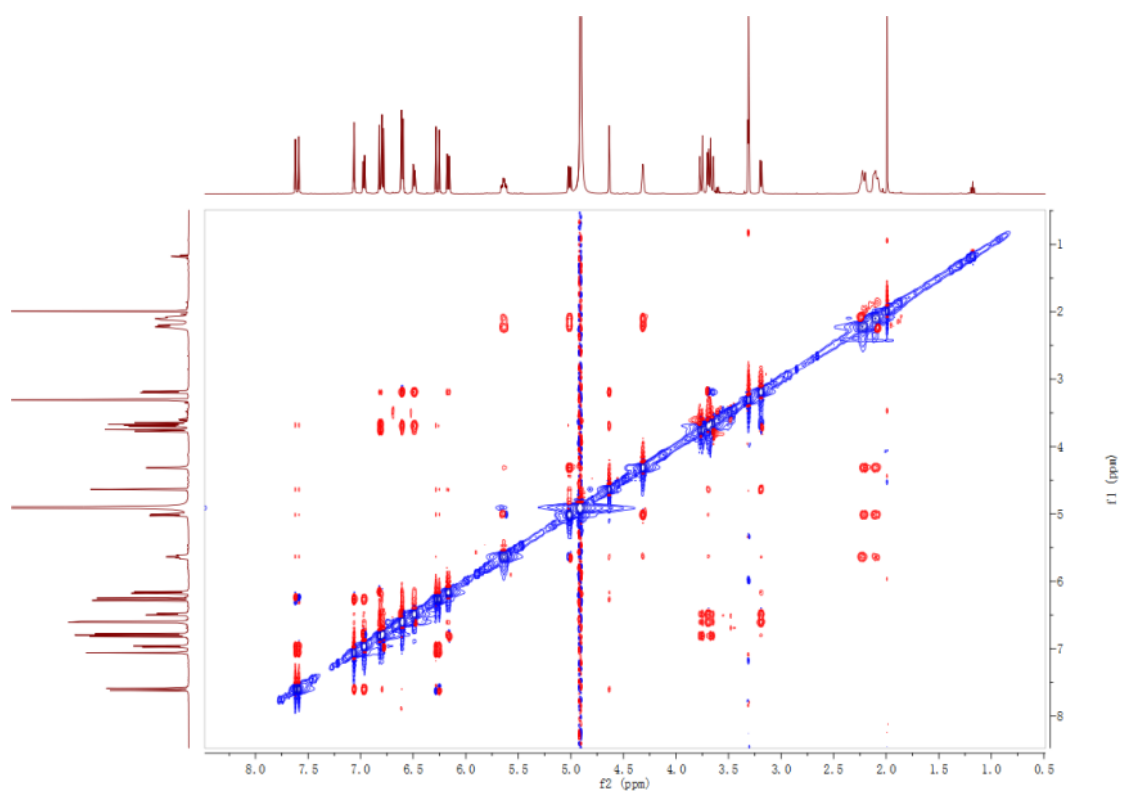

Figure 10. The ROESY Spectrum of Compound **1** in  $\text{MeOH-}d_4$  (500 Hz)

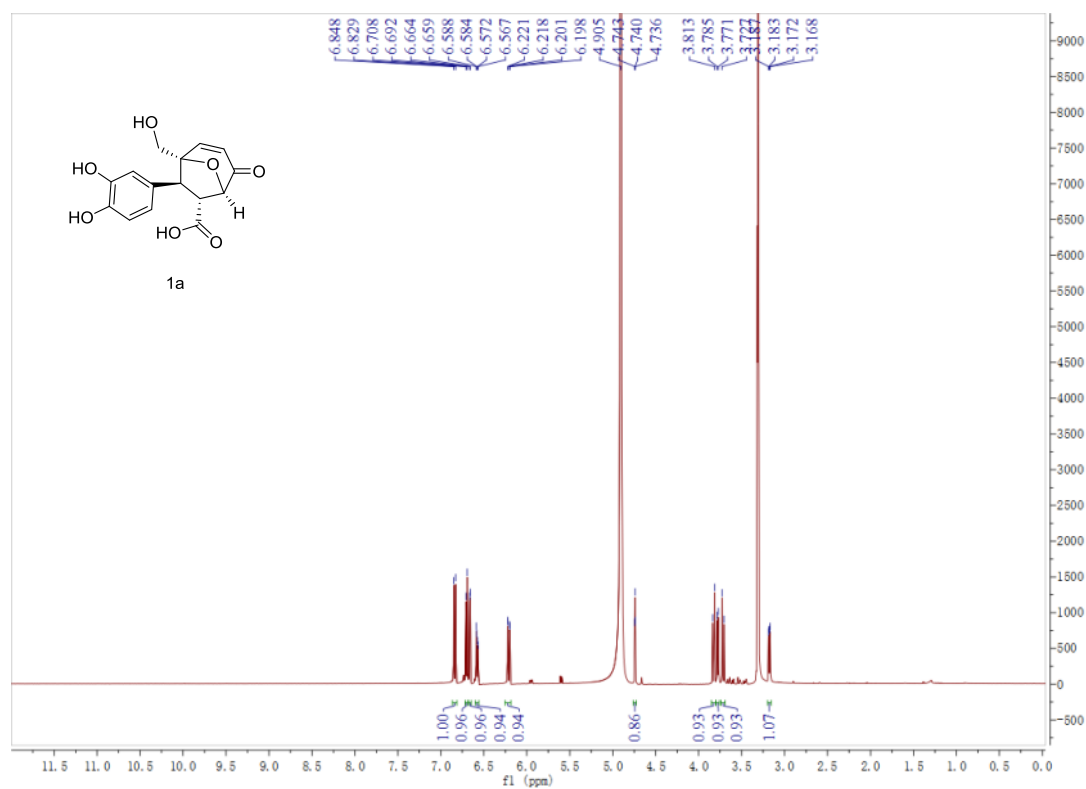

Figure 11. The  $^1\text{H}$  NMR Spectrum of Compound **1a** in  $\text{MeOH-}d_4$  (500  $\text{Hz}$ )

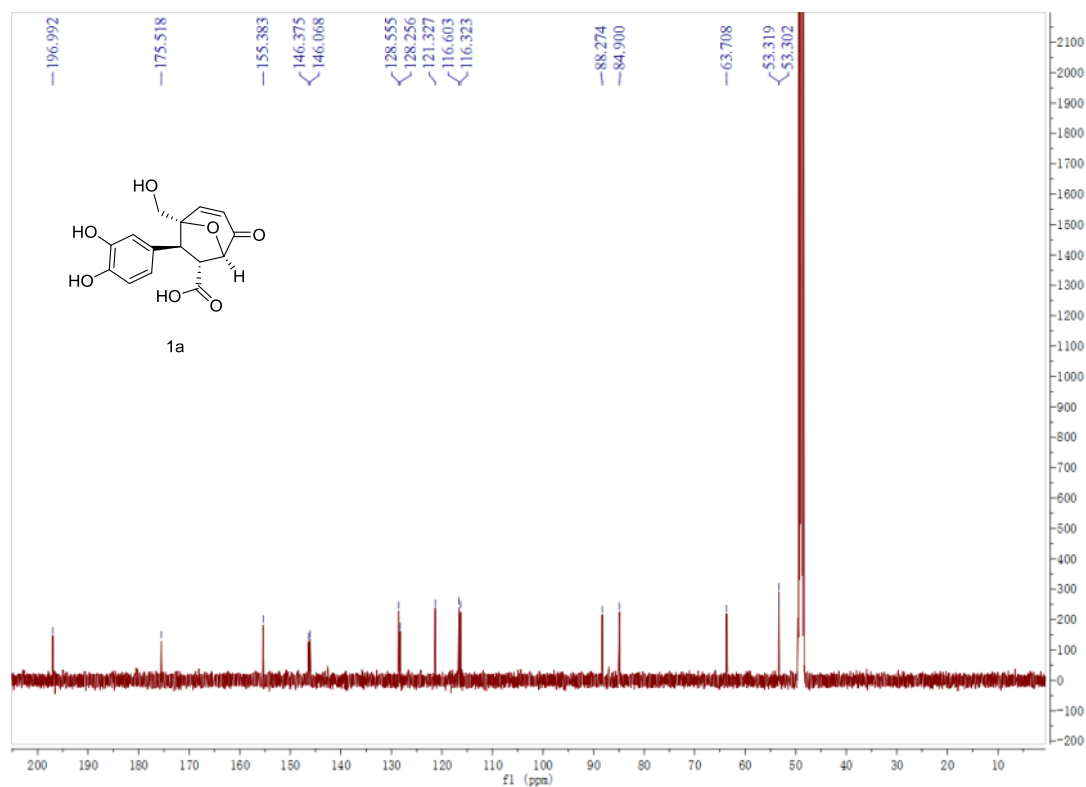

Figure 12. The  $^{13}\text{C}$  NMR Spectrum of Compound **1a** in  $\text{MeOH-}d_4$  (500  $\text{Hz}$ )



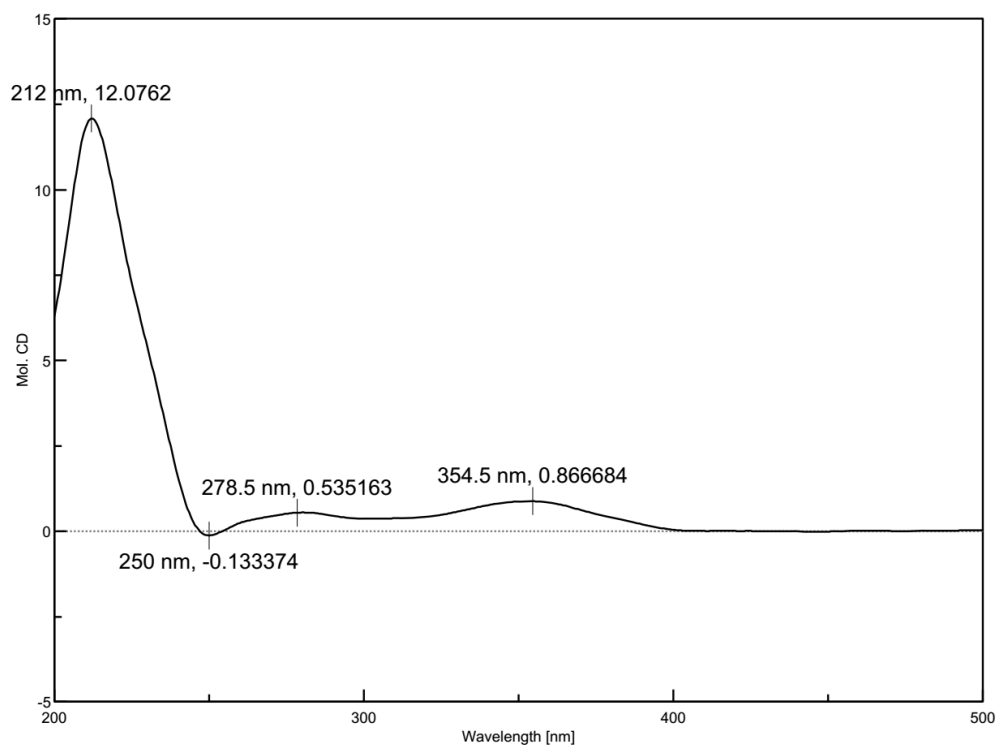

Figure 13. The ECD Spectrum of compound **1a** in MeOH

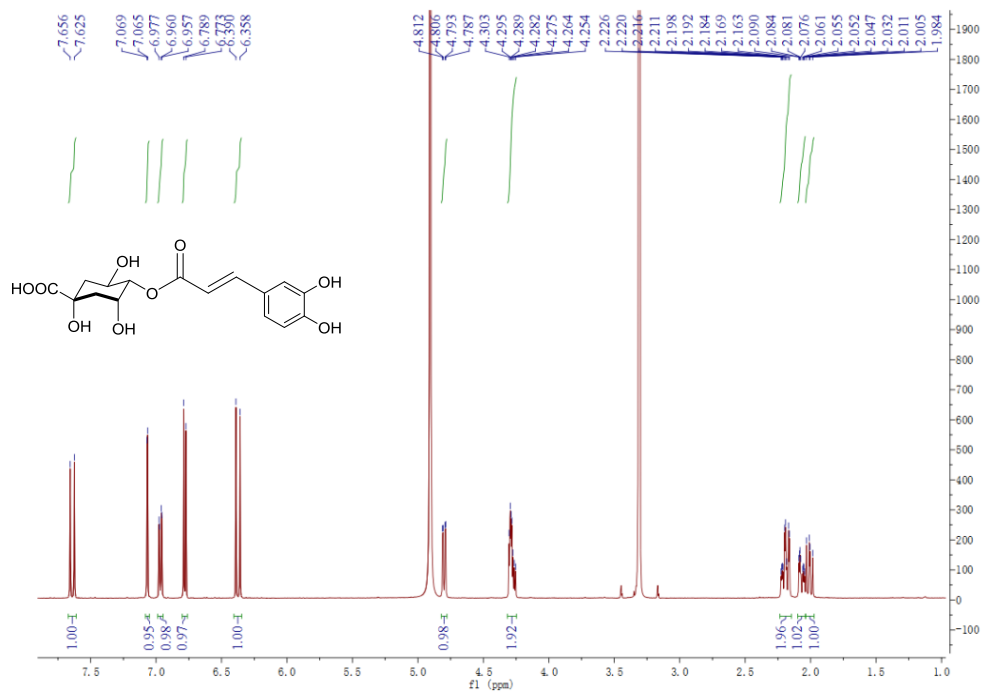

Figure 14. The  $^1\text{H}$  NMR Spectrum of Compound **1b** in  $\text{MeOH-}d_4$  (500  $\text{MHz}$ )

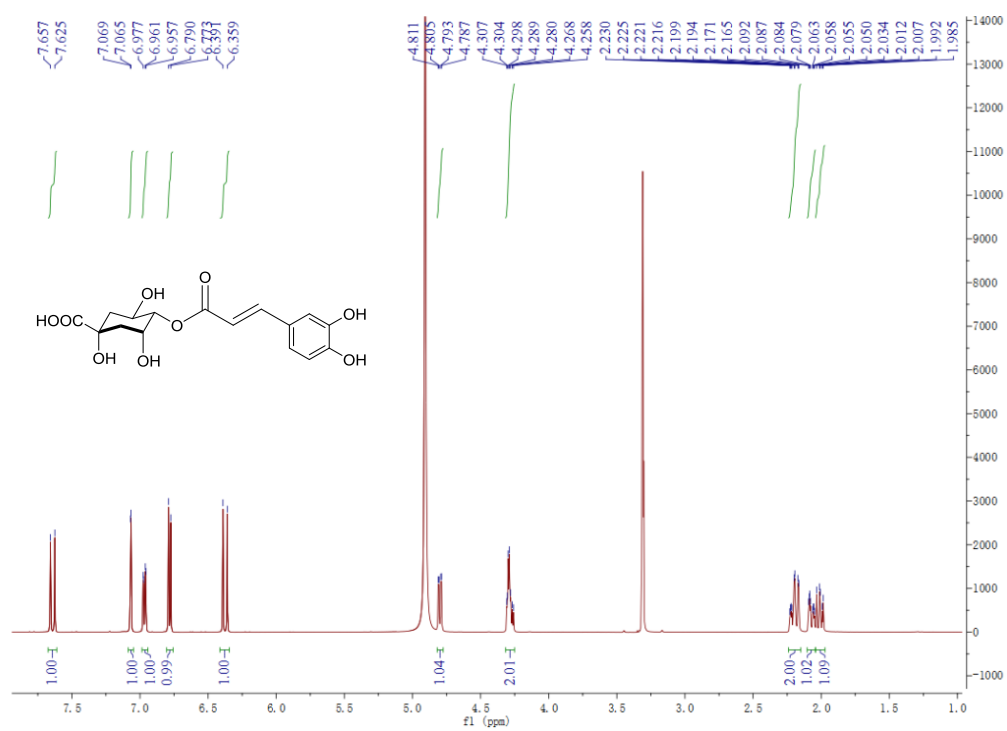

Figure 15. The <sup>1</sup>H NMR Spectrum of standard 4-O-caffeoylquinic acid in MeOH-d<sub>4</sub> (500 Hz)

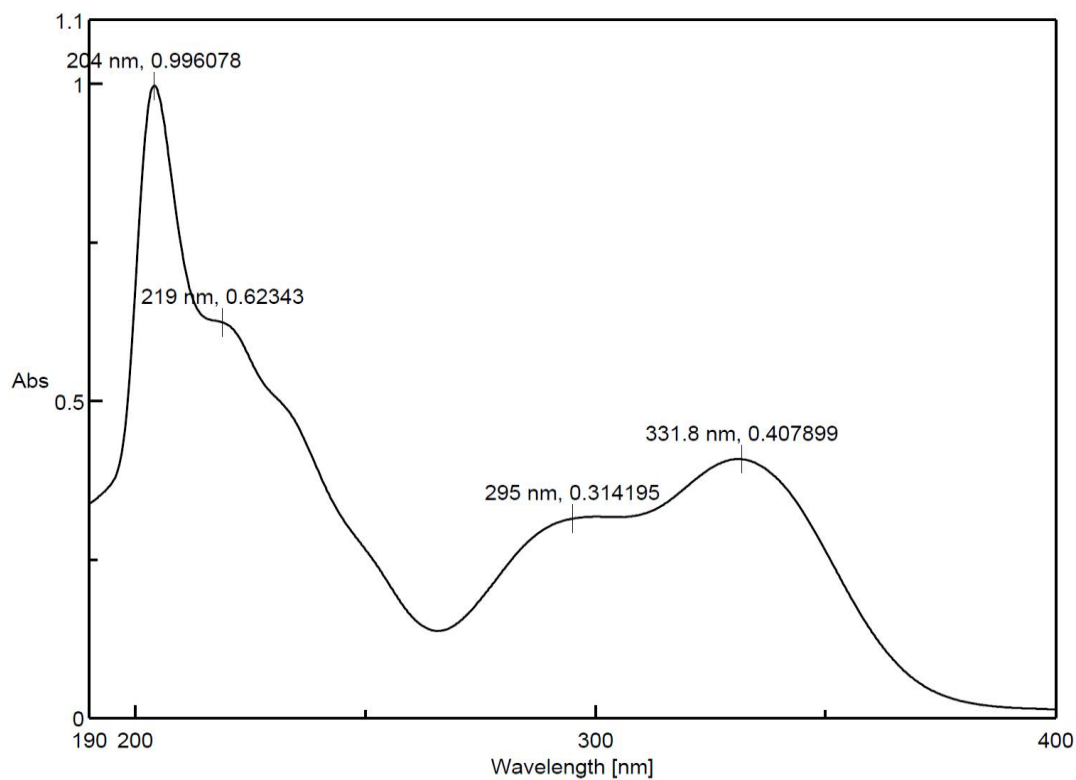

Figure 16. The UV Spectrum of compound **2** in MeOH

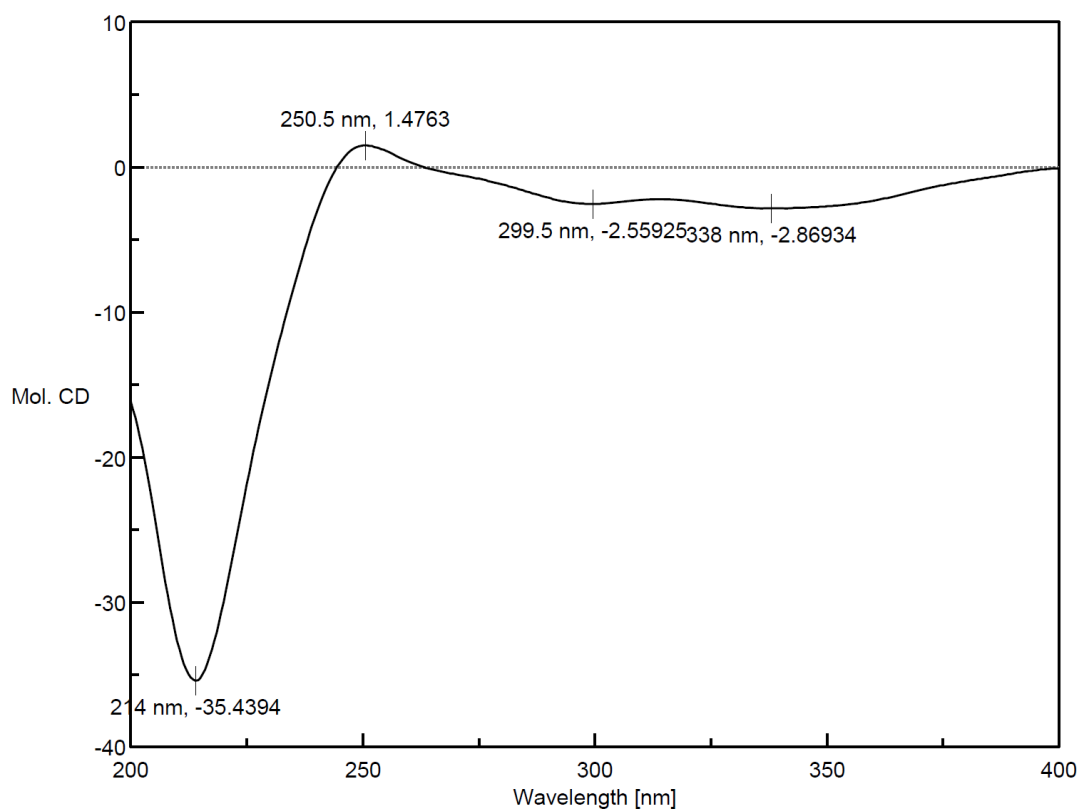

Figure 17. The ECD Spectrum of compound **2** in MeOH

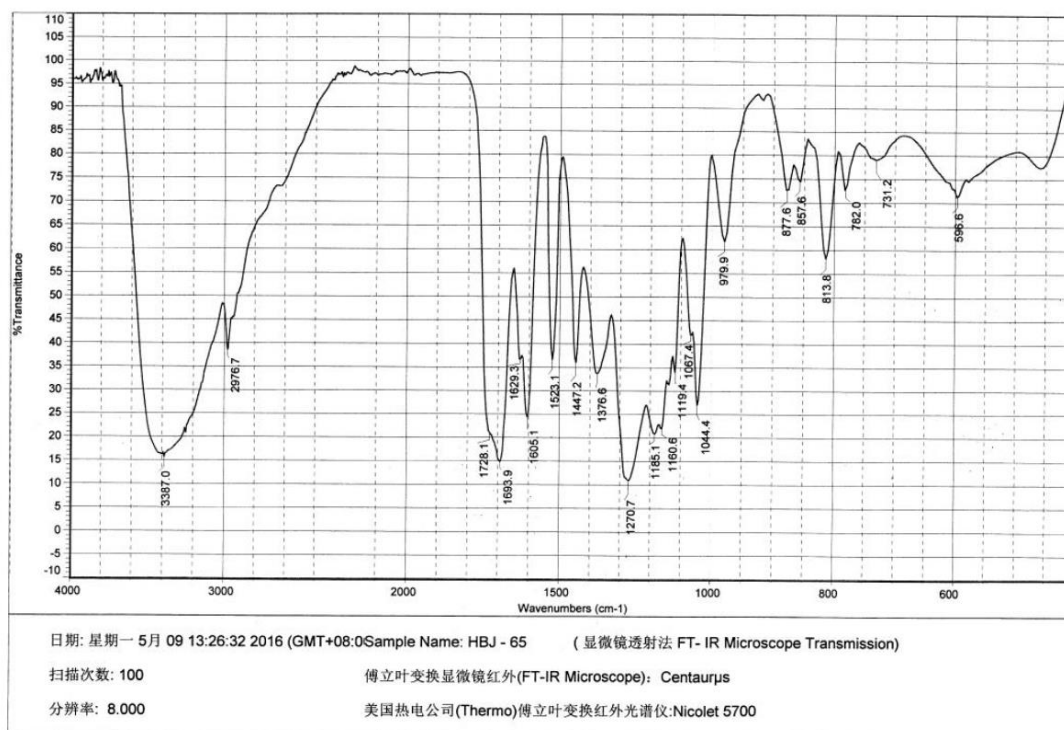

Figure 18. The IR Spectrum (KBr) of compound **2**

## Qualitative Analysis Report

**Data Filename** 2016011801.d  
**Sample Type** Sample  
**Instrument Name** Instrument 1  
**Acq Method** TEST LCMS.m  
**DA Method**  
**Sample Name** HBI-65  
**Position** P1-C1  
**User Name**  
**IRM Calibration Status**  
**Comment**

### User Chromatograms

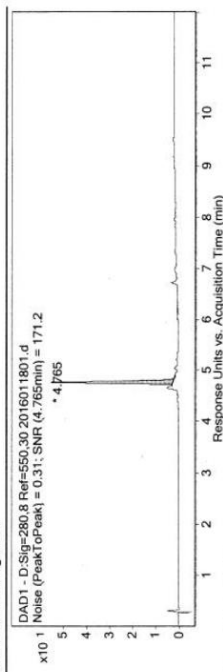

### Integration Peak List

| Peak | Start | RT    | End   | Height | Area   | Area % | Signal To Noise |
|------|-------|-------|-------|--------|--------|--------|-----------------|
| 1    | 4.711 | 4.765 | 4.898 | 52.58  | 162.91 | 100    | 171.2           |

Fragmentor Voltage 135 Collision Energy 0 Ionization Mode ESI

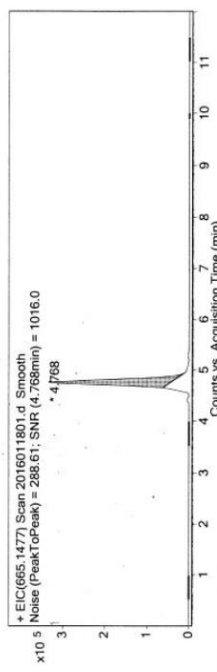

### Integration Peak List

| Peak | Start | RT    | End   | Height | Area    | Area % | Signal To Noise |
|------|-------|-------|-------|--------|---------|--------|-----------------|
| 1    | 4.655 | 4.768 | 4.945 | 293212 | 2163305 | 100    | 1016            |

### User Spectra

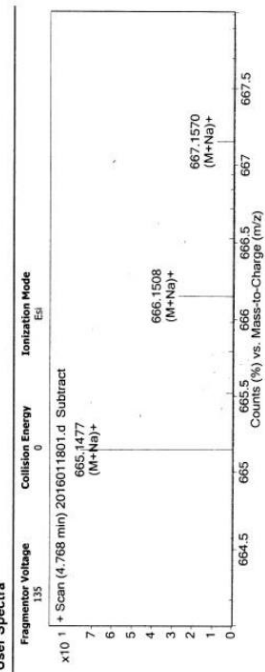

Figure 19. The HR-ESI-MS Data of compound **2**

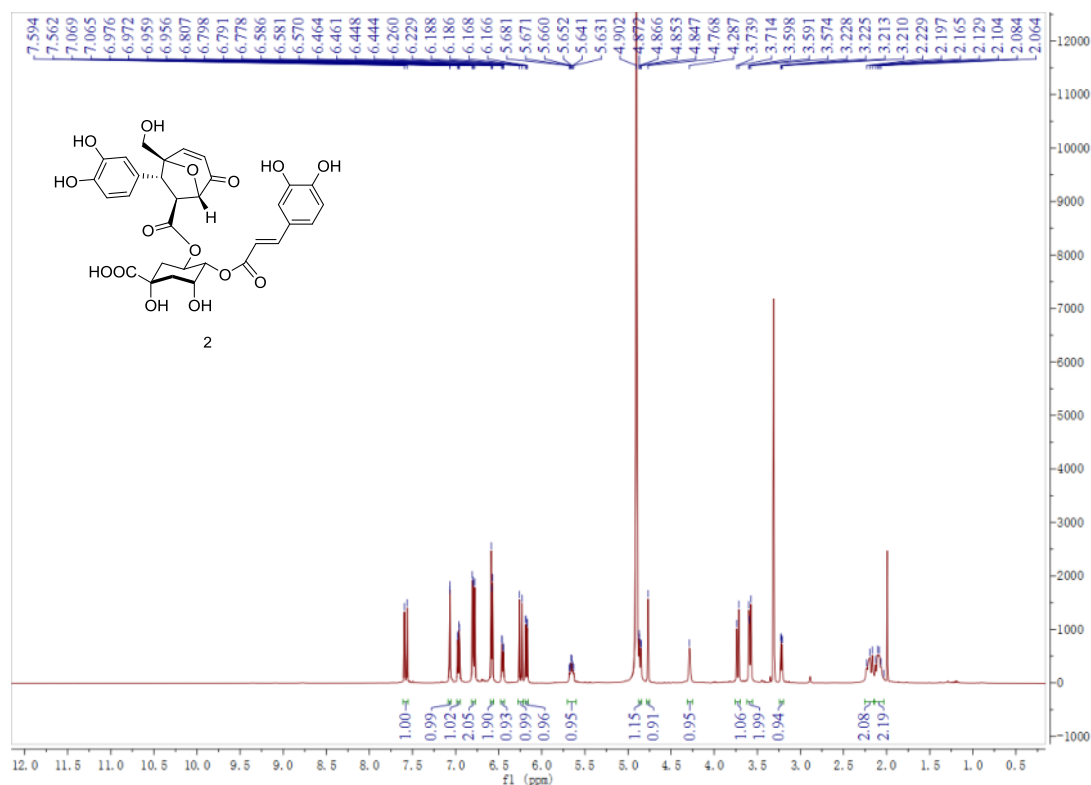

Figure 20. The  $^1\text{H}$  NMR Spectrum of Compound **2** in  $\text{MeOH-}d_4$  (500  $\text{Hz}$ )

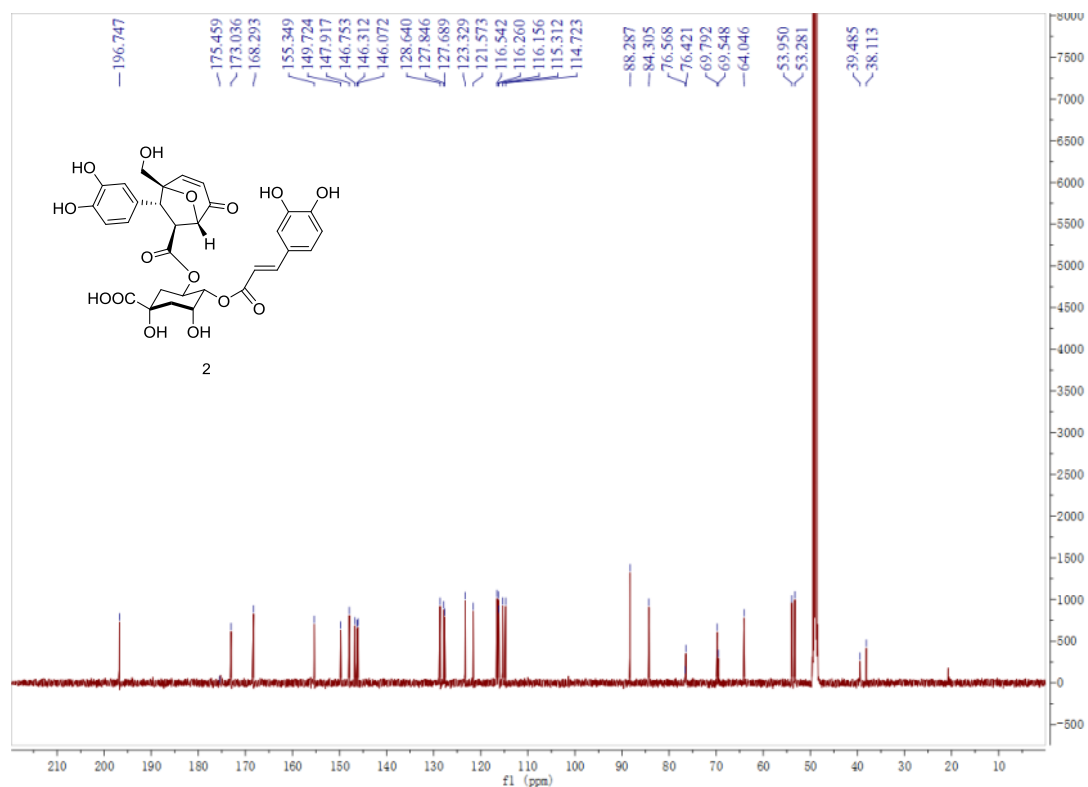

Figure 21. The  $^{13}\text{C}$  NMR Spectrum of Compound 2 in  $\text{MeOH-}d_4$  (500  $\text{Hz}$ )

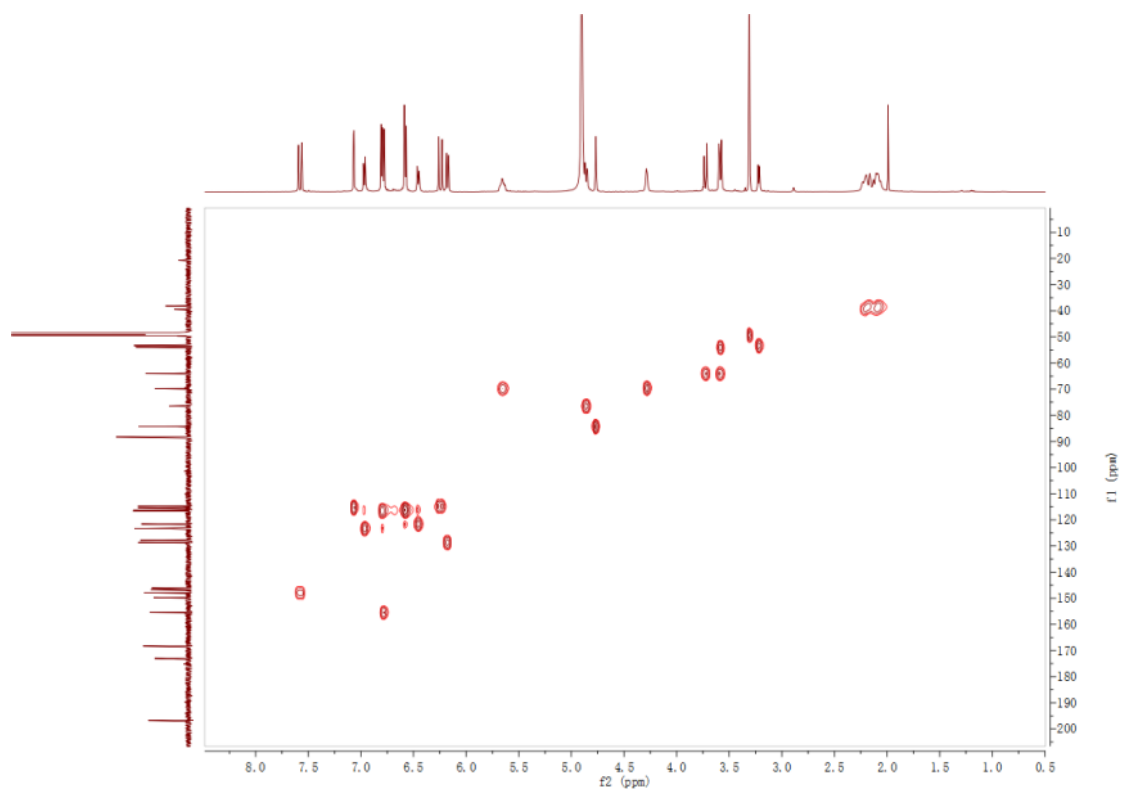

Figure 22. The HSQC Spectrum of Compound 2 in  $\text{MeOH-}d_4$  (500  $\text{Hz}$ )

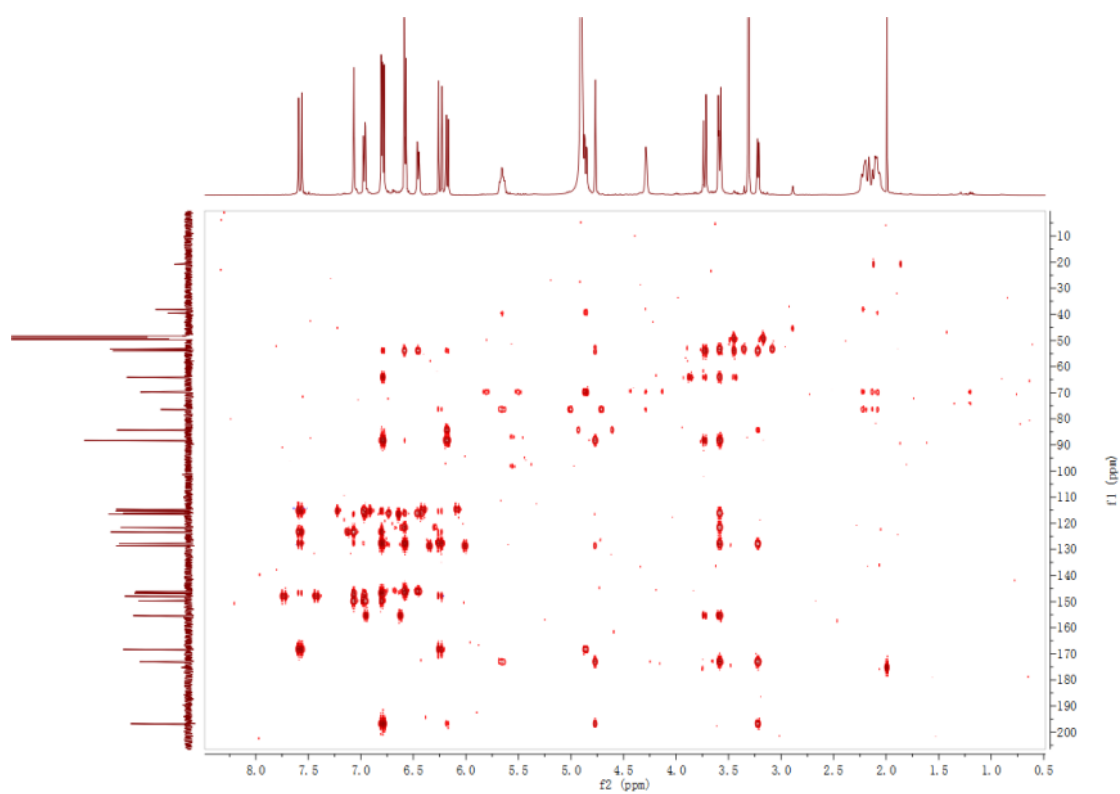

Figure 23. The HMBC Spectrum of Compound **2** in MeOH- $d_4$  (500 Hz)

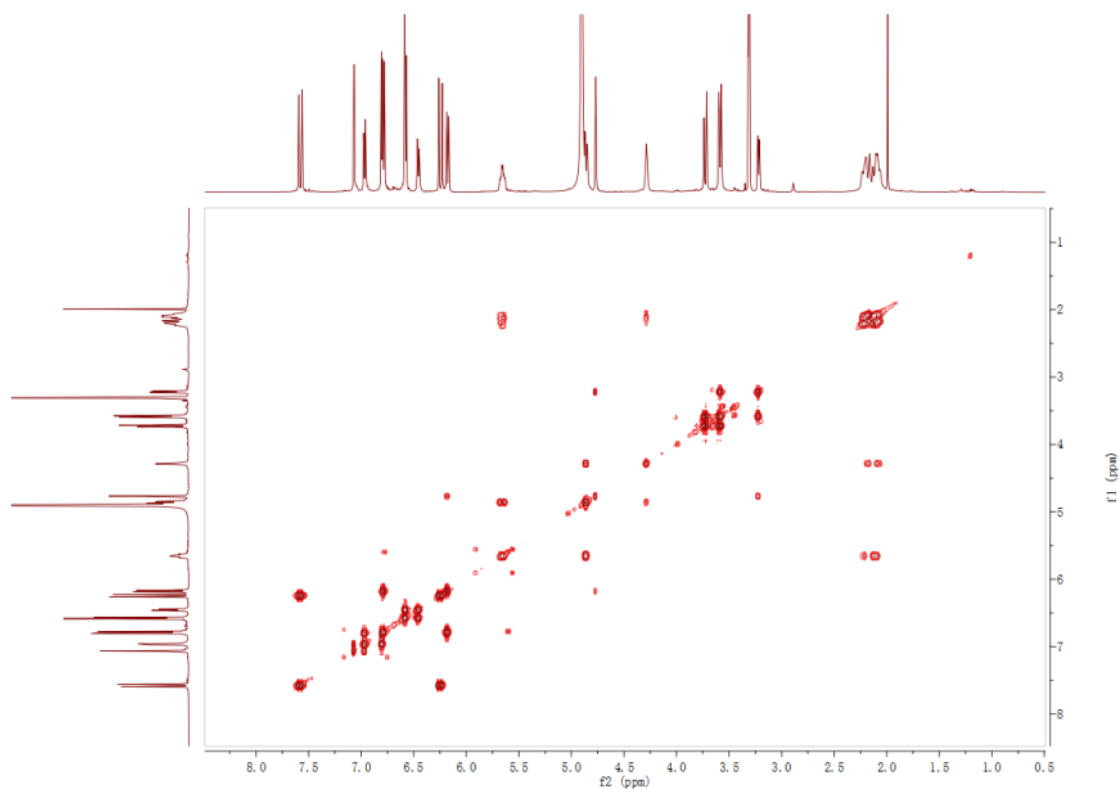

Figure 24. The  $^1\text{H}$ - $^1\text{H}$  COSY Spectrum of Compound **2** in MeOH- $d_4$  (500 Hz)

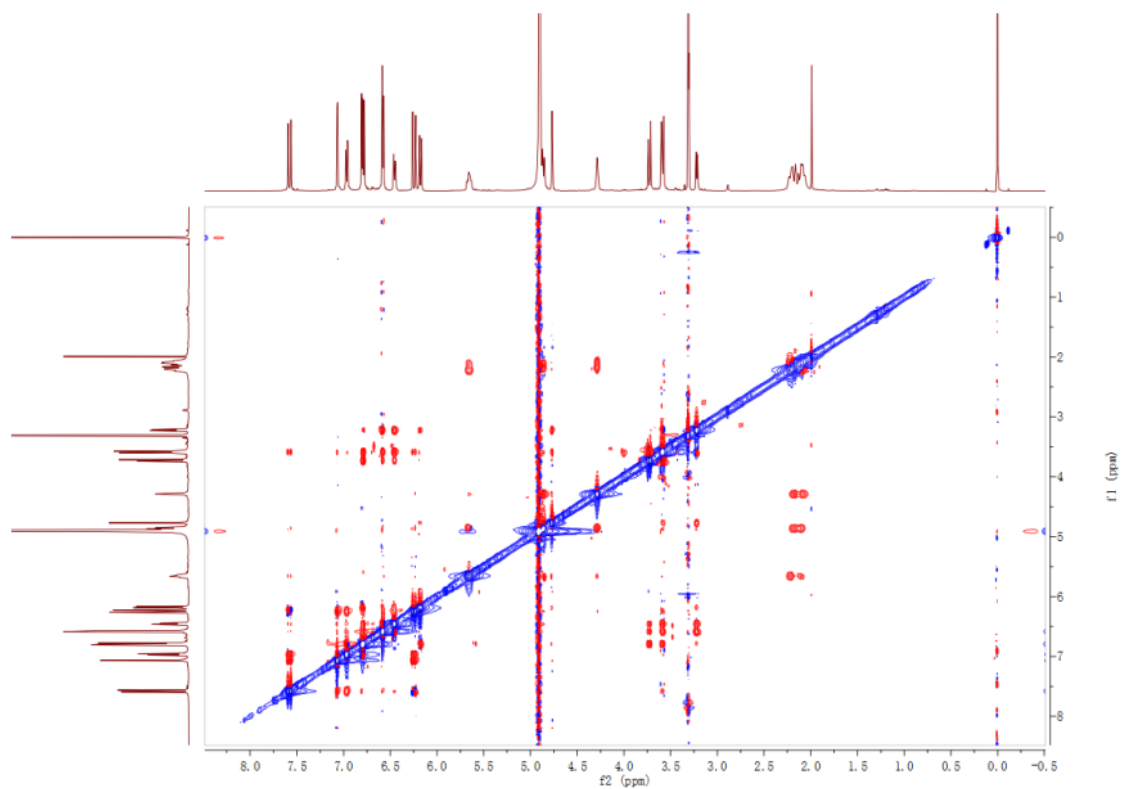

Figure 25. The ROESY Spectrum of Compound **2** in MeOH-*d*<sub>4</sub> (500 Hz)

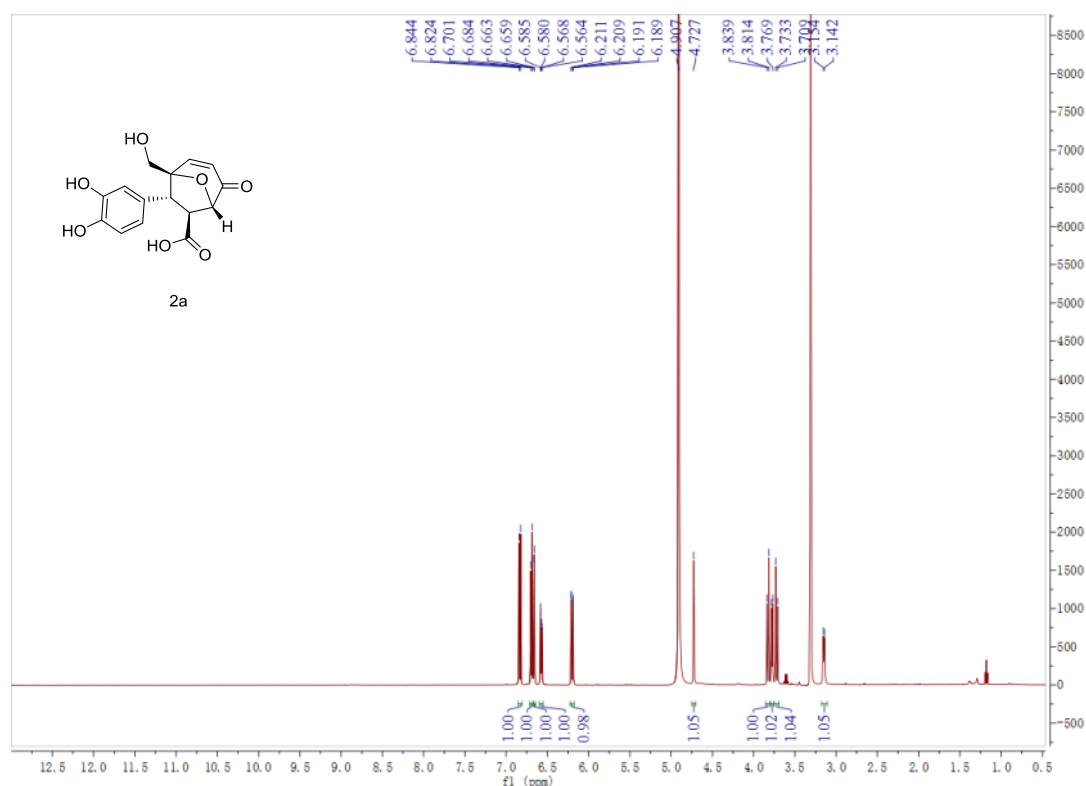

Figure 26. The <sup>1</sup>H NMR Spectrum of Compound **2a** in MeOH-*d*<sub>4</sub> (500 Hz)

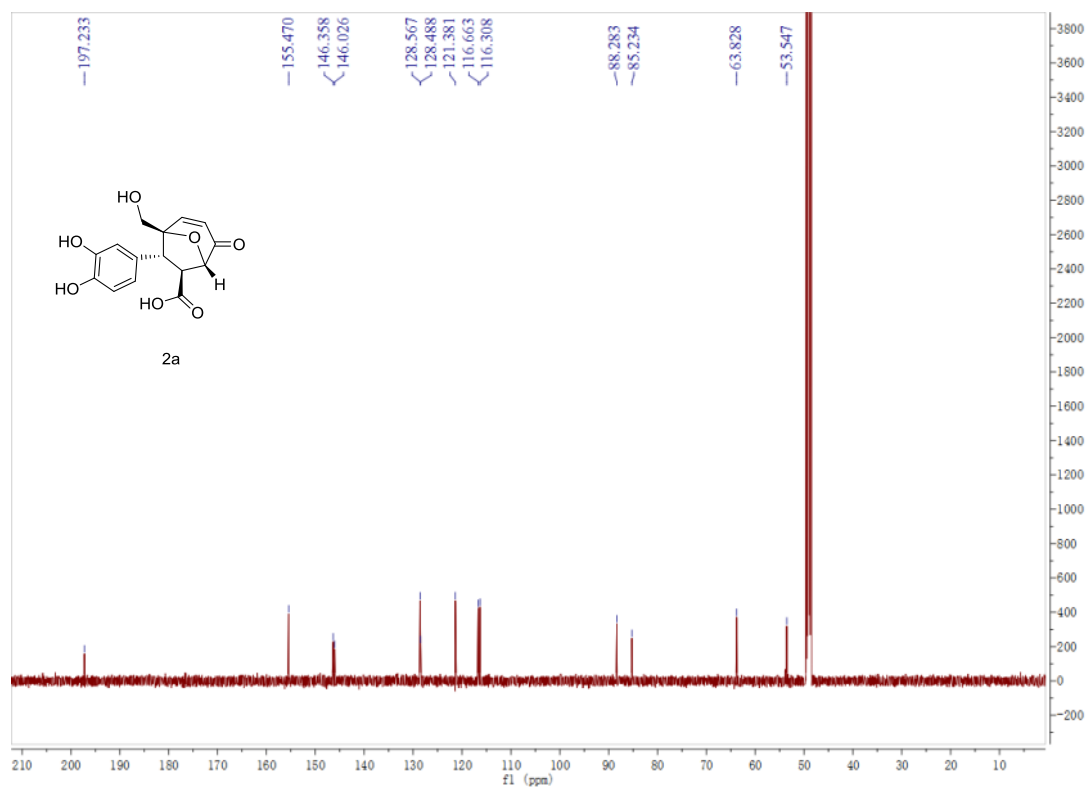

Figure 27. The  $^{13}\text{C}$  NMR Spectrum of Compound **2a** in  $\text{MeOH-}d_4$  (500 Hz)

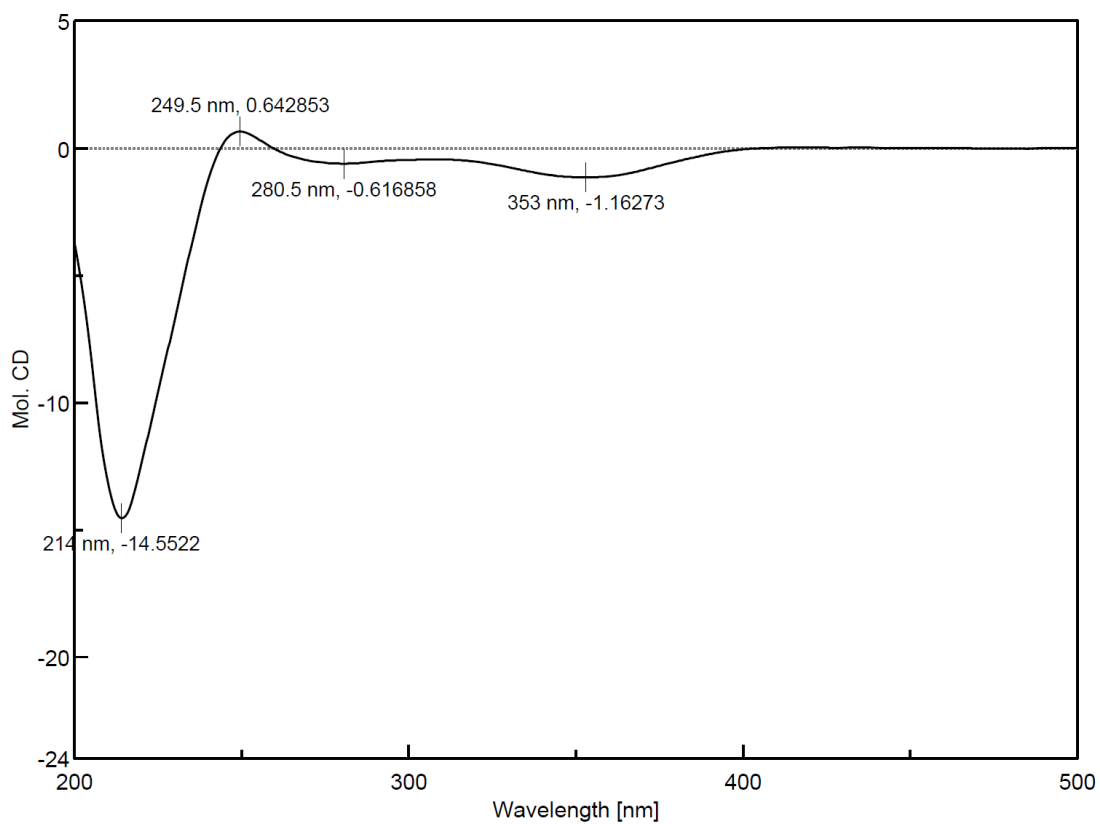

Figure 28. The ECD Spectrum of Compound **2a** in  $\text{MeOH}$



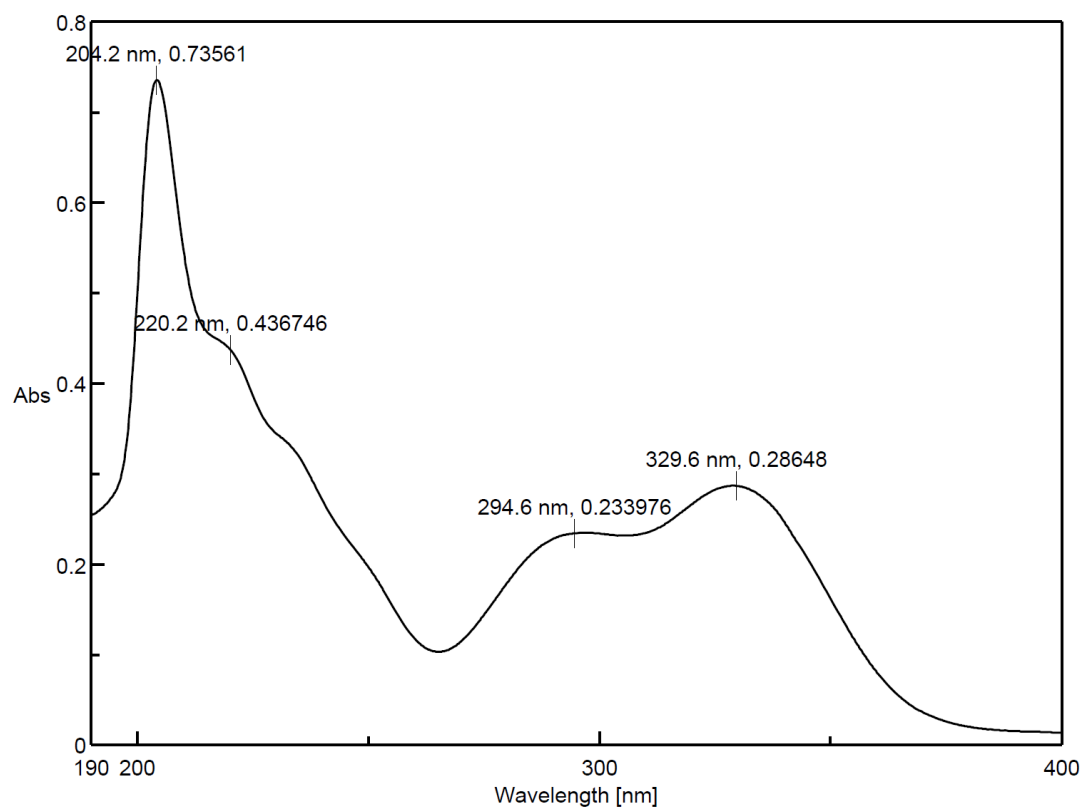

Figure 29. The UV Spectrum of Compound **3** in MeOH

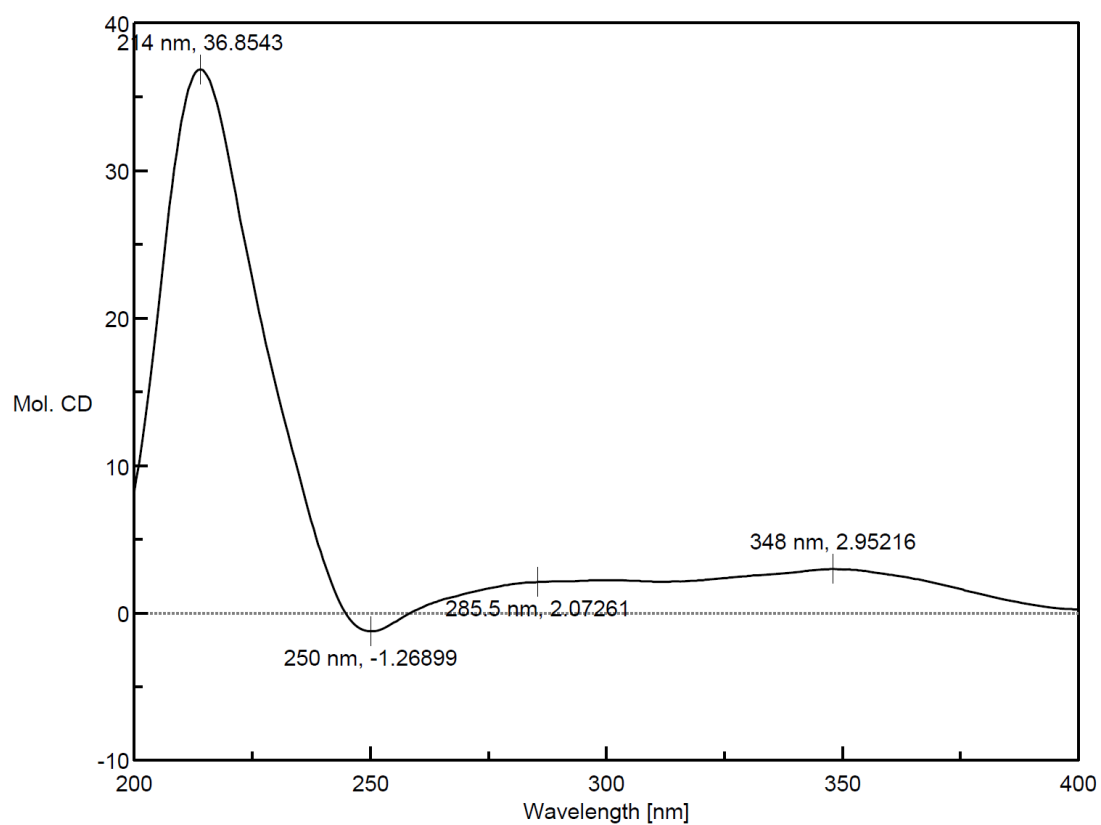

Figure 30. The ECD Spectrum of Compound **3** in MeOH

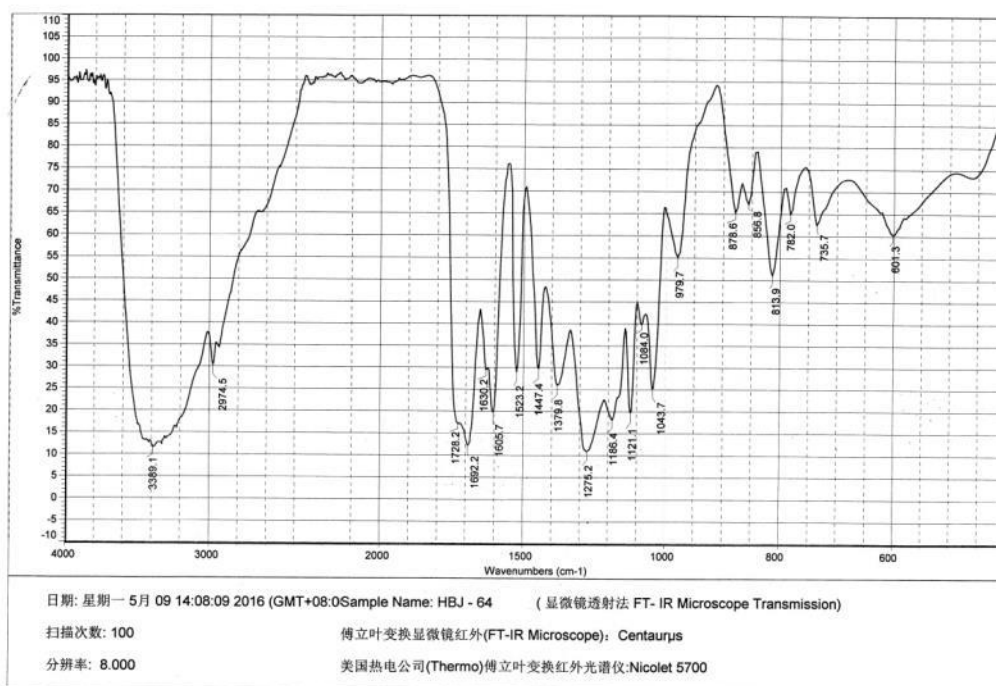

Figure 31. The IR Spectrum (KBr) of compound **3**

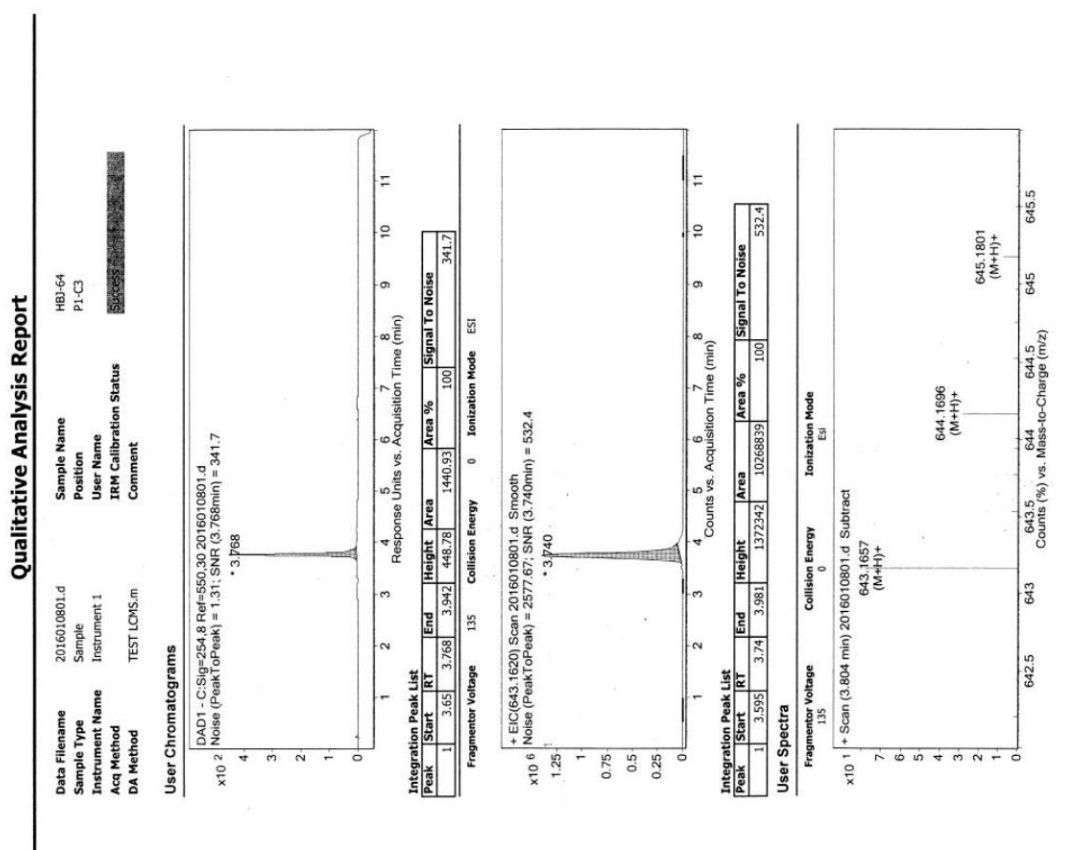

Figure 32. The IR Spectrum (KBr) of compound **3**

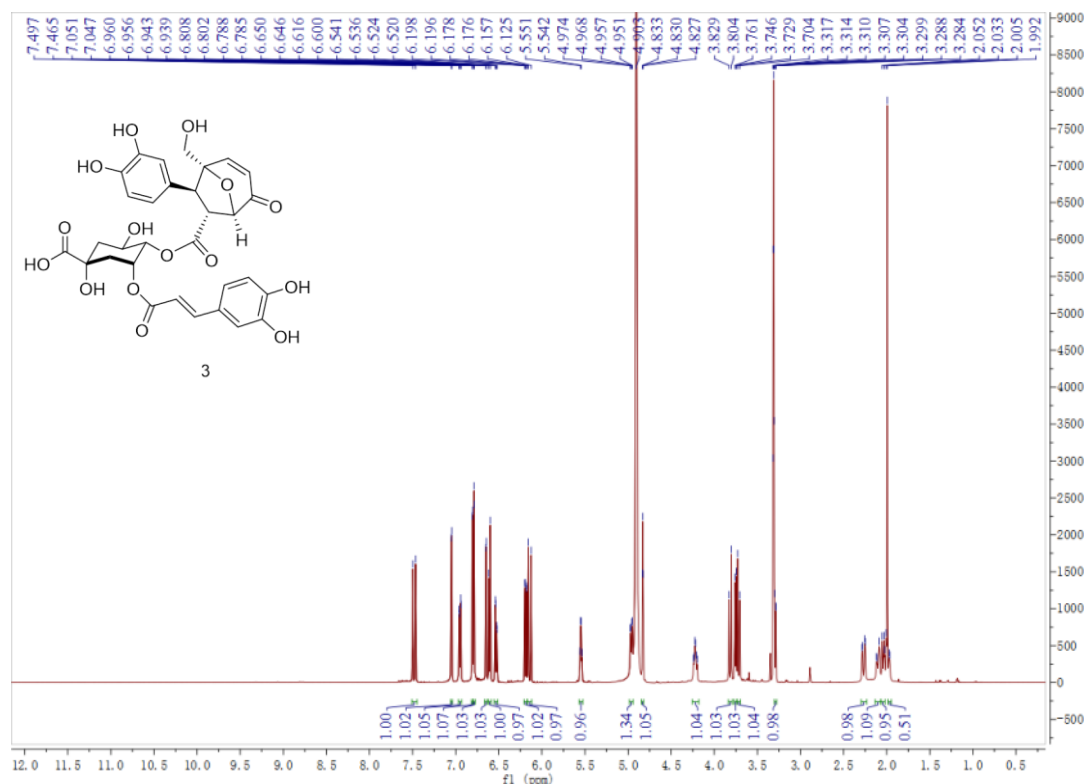

Figure 33. The  $^1\text{H}$  NMR Spectrum of Compound **3** in  $\text{MeOH-}d_4$  (500  $\text{Hz}$ )

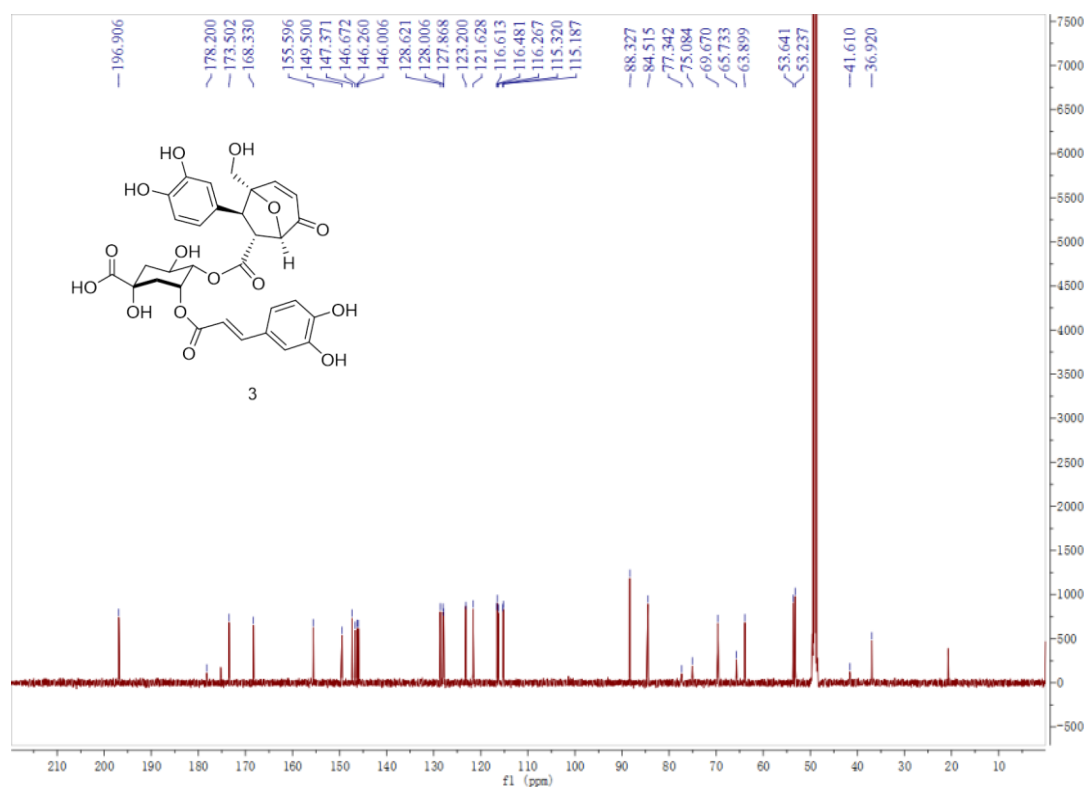

Figure 34. The  $^{13}\text{C}$  NMR Spectrum of Compound **3** in  $\text{MeOH-}d_4$  (500  $\text{Hz}$ )

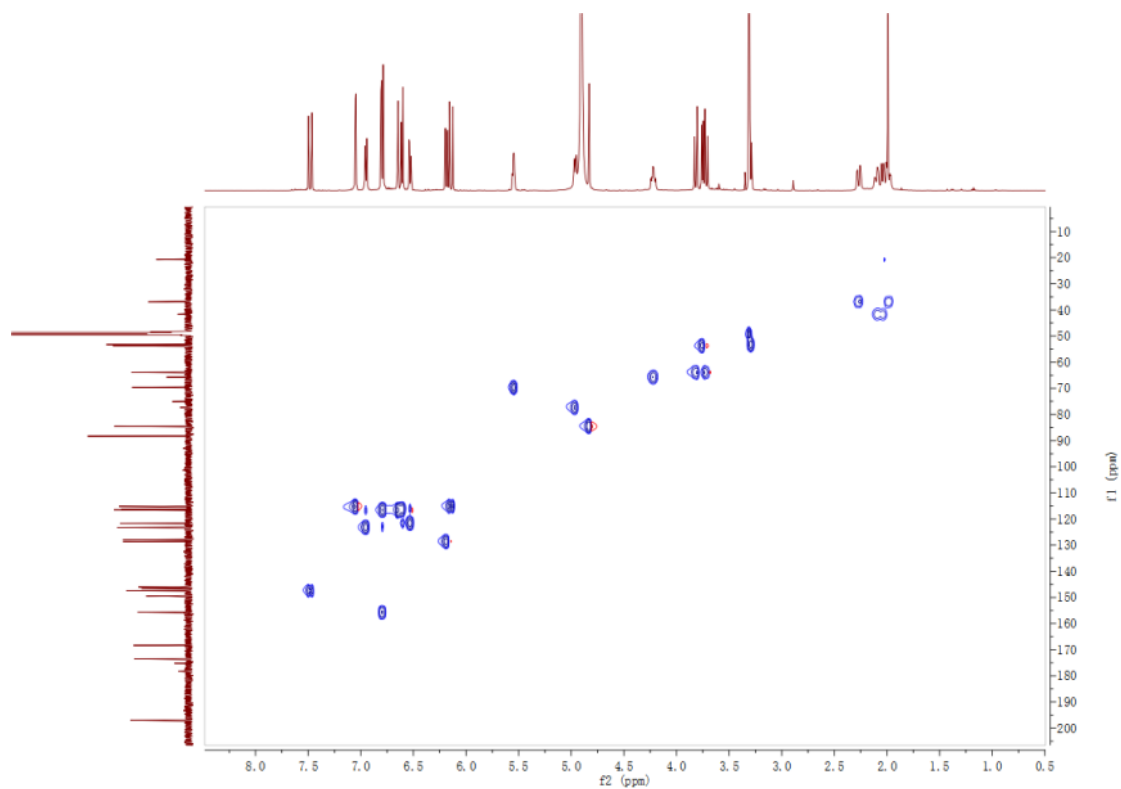

Figure 35. The HSQC Spectrum of Compound **3** in MeOH-*d*<sub>4</sub> (500 Hz)

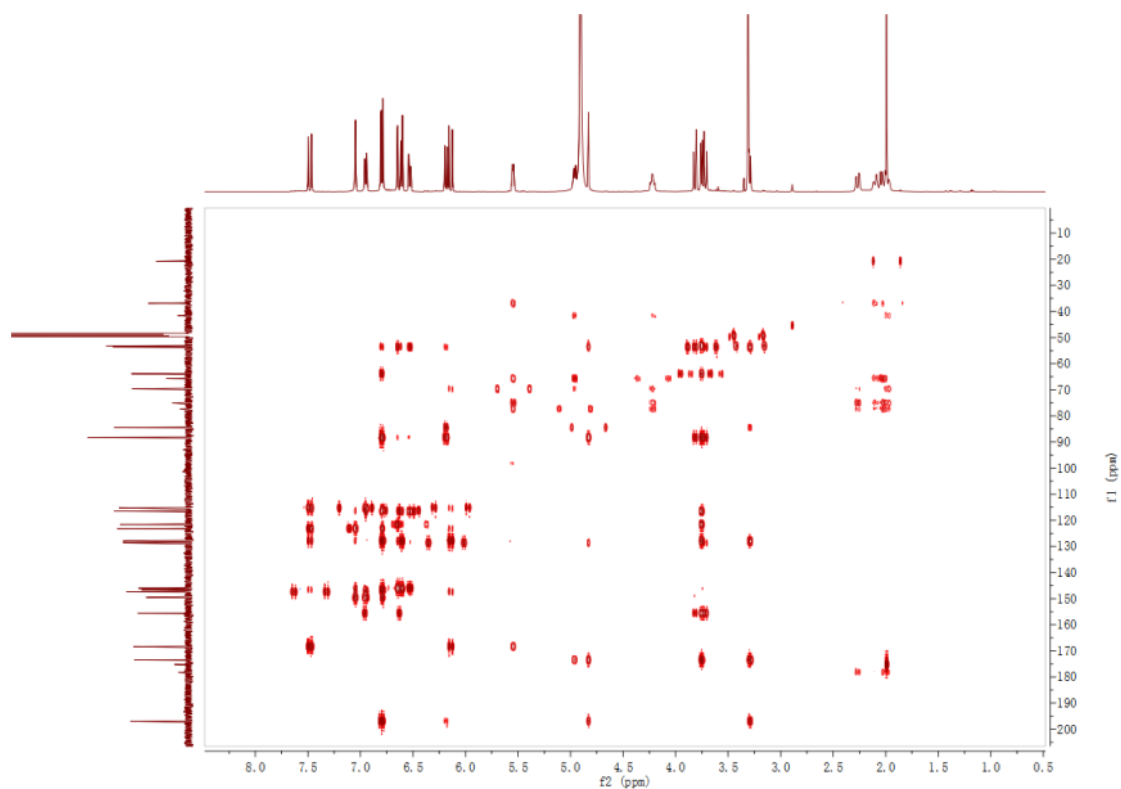

Figure 36. The HMBC Spectrum of Compound **3** in MeOH-*d*<sub>4</sub> (500 Hz)

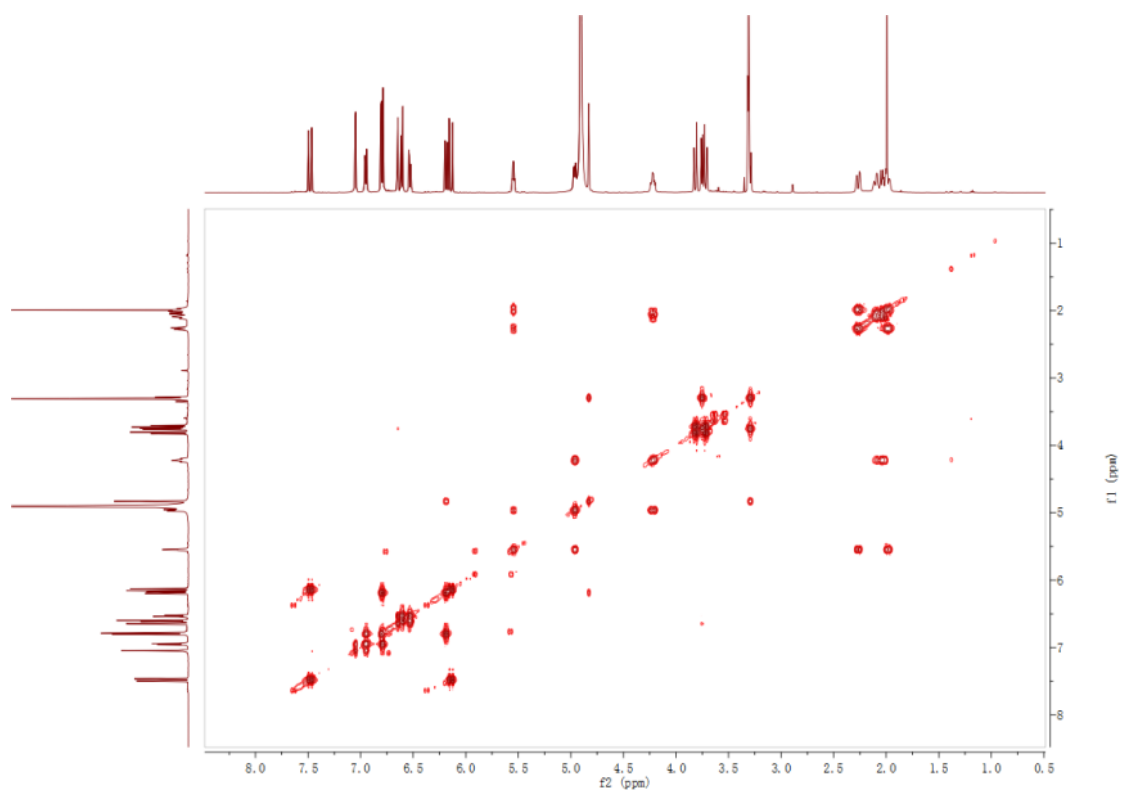

Figure 37. The  $^1\text{H}$ - $^1\text{H}$  COSY Spectrum of Compound **3** in  $\text{MeOH-}d_4$  (500  $\text{Hz}$ )

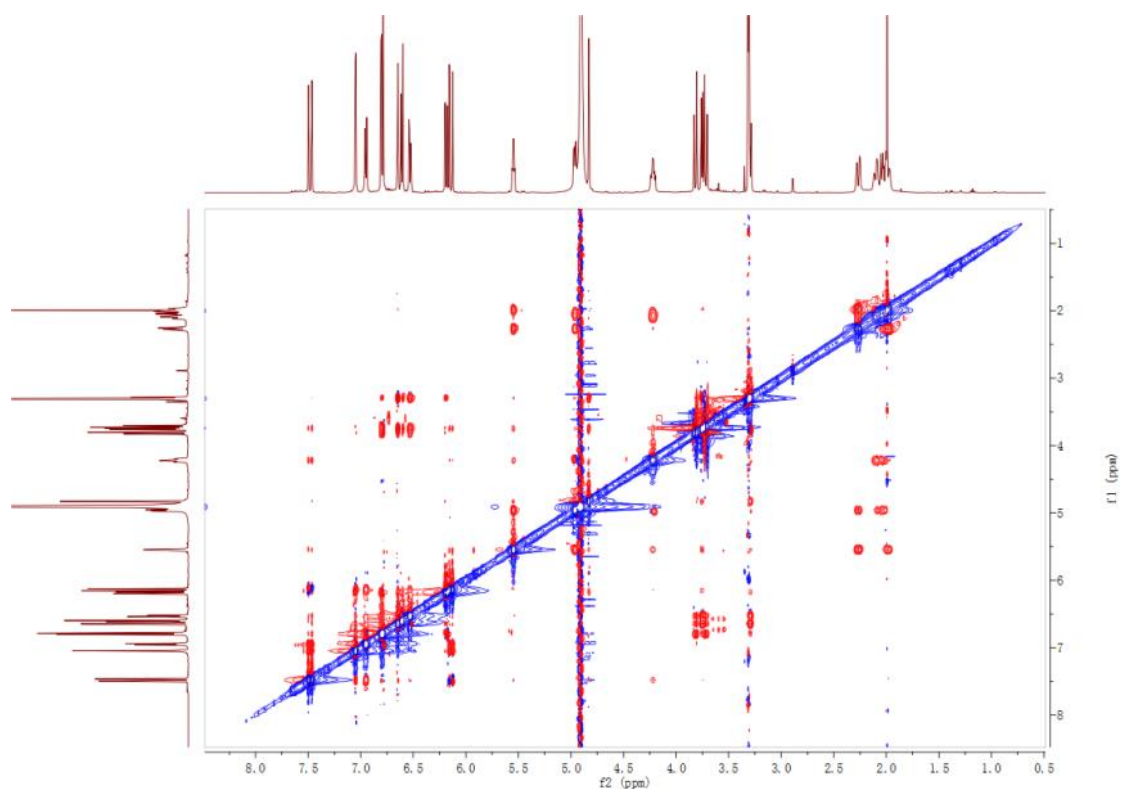

Figure 38. The ROESY Spectrum of Compound **3** in  $\text{MeOH-}d_4$  (500  $\text{Hz}$ )

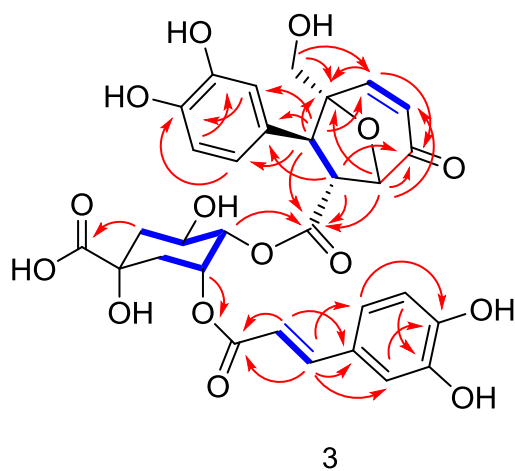

Figure 39.  $^1\text{H}$ - $^1\text{H}$  COSY and Key HMBC of compound **3**

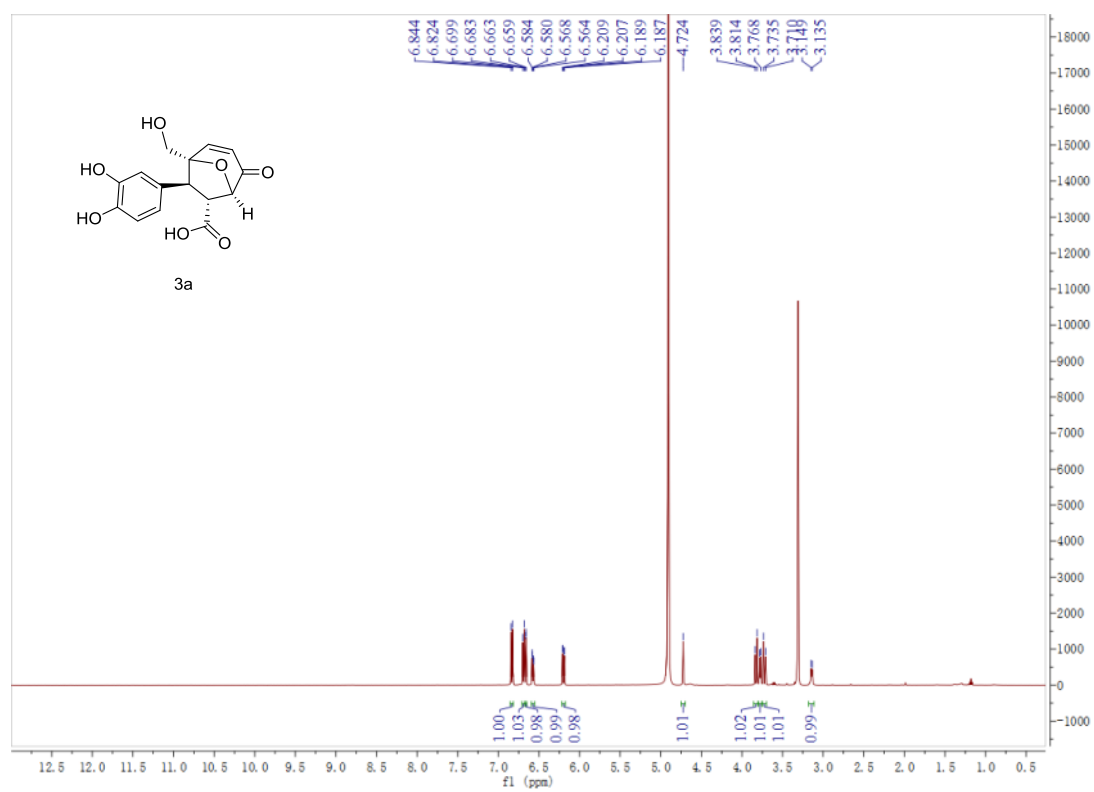

Figure 40. The  $^1\text{H}$  NMR Spectrum of Compound **3a** in  $\text{MeOH-}d_4$  (500  $\text{H}_z$ )

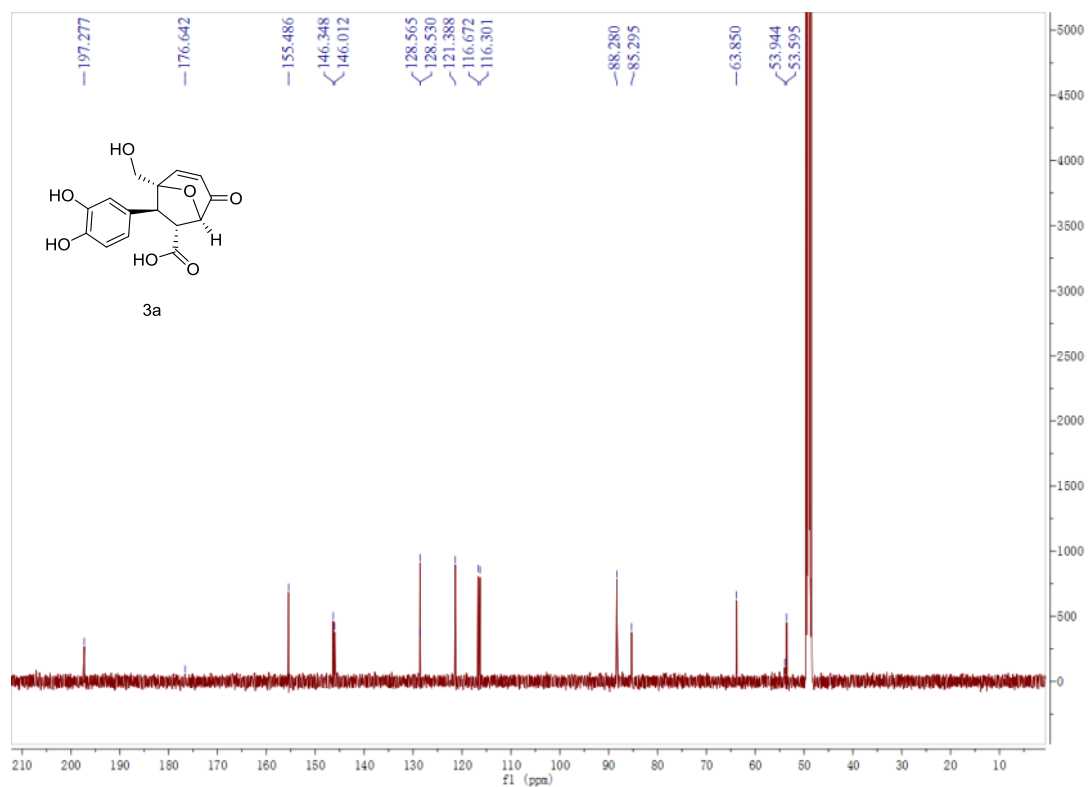

Figure 41. The  $^{13}\text{C}$  NMR Spectrum of Compound **3a** in  $\text{MeOH-}d_4$  (500 Hz)

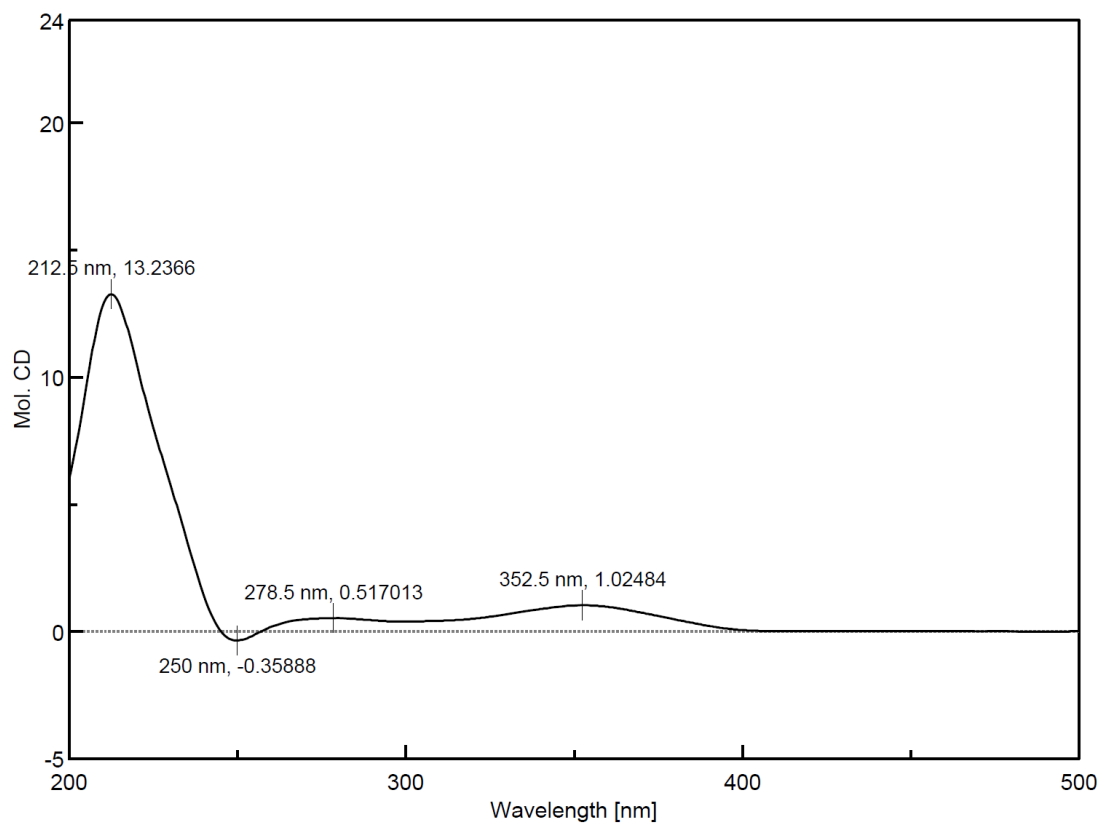

Figure 42. The ECD Spectrum of Compound **3a** in  $\text{MeOH}$

### **ECD Calculation of (7''R, 8''S, 10''S, 14''S)-1a**

Systematic conformational analyses of (7''R, 8''S, 10''S, 14''S)-**1a** were carried out via searching in the Discovery Studio (version 16.1.0.15350) using the MMFF94 force field. Conformers with Boltzmann distribution over 1% were chosen as the beginning for ECD calculations. Ground-state geometries were optimized at the B3LYP/6-311+G (d, p) level in gas phase by the Gaussian 09 program package (Gaussian Inc., Wallingford, CT, USA) and vibrational analysis were done to confirm these minima. All quantum computations were performed on an IBM cluster machine located at the High Performance Computing Center of Peking Union Medical College. The energies, oscillator strengths, and rotational strengths (velocity) of the first 50 electronic excitations were calculated using the TDDFT methodology at the B3LYP/6-311+G (d, p) level in methanol. The ECD spectra were simulated by the overlapping Gaussian function (half the bandwidth at 1/e peak height, 0.25 eV). The overall theoretical ECD spectra were obtained based on the Boltzmann weighting of each conformers. By comparison of the calculated and experimental ECD spectra, the configurations were resolved.



**Table S1. 13 Conformers of (7''*R*, 8''*S*, 10''*S*, 14''*S*)-1a with Boltzmann Distribution over 1%.**

| No. | conformer                                                                           | rel. E (kJ/mol) | Boltzmann Dist |
|-----|-------------------------------------------------------------------------------------|-----------------|----------------|
| 1   | 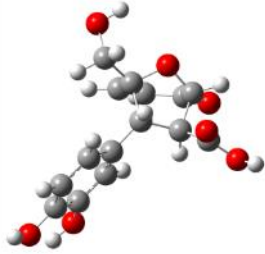   | 0.00            | 0.279          |
| 2   |    | 2.35            | 0.108          |
| 3   |  | 2.46            | 0.103          |
| 4   |  | 2.65            | 0.096          |
| 5   |  | 3.10            | 0.080          |

|    |                                                                                     |      |       |
|----|-------------------------------------------------------------------------------------|------|-------|
| 6  | 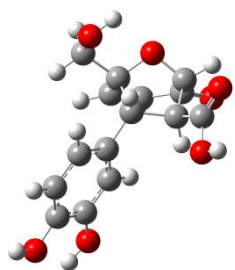   | 3.58 | 0.066 |
| 7  |    | 4.32 | 0.049 |
| 8  |   | 4.90 | 0.039 |
| 9  |  | 4.93 | 0.038 |
| 10 |  | 5.48 | 0.031 |
| 11 |  | 5.53 | 0.030 |

|    |                                                                                   |      |       |
|----|-----------------------------------------------------------------------------------|------|-------|
| 12 | 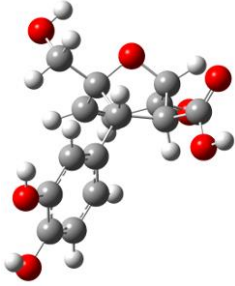 | 6.00 | 0.025 |
| 13 |  | 7.30 | 0.015 |

**Table S2. Energies and Vibrational Analysis of (7''R, 8''S, 10''S, 14''S)-1a**

| Conformation | Energy (A.U.) | Energy (kcal/mol)  | Boltzmann (%) | Number of imaginary frequencies |
|--------------|---------------|--------------------|---------------|---------------------------------|
| 1            | -1106.623446  | -694599.6422292608 | 7.93          | 0                               |
| 2            | -1106.623143  | -694599.370329774  | 5.01          | 0                               |
| 3            | -1106.623404  | -694599.532164603  | 6.58          | 0                               |
| 4            | -1106.623262  | -694599.522814704  | 6.48          | 0                               |
| 5            | -1106.623174  | -694599.469539105  | 5.92          | 0                               |
| 6            | -1106.623818  | -694599.903587772  | 12.33         | 0                               |
| 7            | -1106.623742  | -694599.873655545  | 11.72         | 0                               |
| 8            | -1106.62356   | -694599.696132966  | 8.68          | 0                               |
| 9            | -1106.62325   | -694599.528713298  | 6.54          | 0                               |
| 10           | -1106.623236  | -694599.429378465  | 5.53          | 0                               |
| 11           | -1106.623554  | -694599.763966797  | 9.74          | 0                               |
| 12           | -1106.622998  | -694599.284172651  | 4.33          | 0                               |
| 13           | -1106.623612  | -694599.73152453   | 9.22          | 0                               |

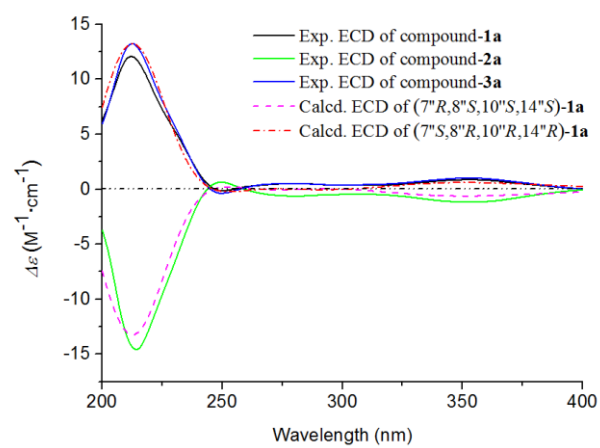

**Figure 43.** Calculated ECD spectra of (7''*S*, 8''*R*, 10''*R*, 14''*R*)-**1a** and (7''*R*, 8''*S*, 10''*S*, 14''*S*)-**1a** and the experimental ECD spectra of **1a**, **2a**, and **3a** in MeOH.
